# Supplementary material
Source: PubMed Central journal article supplement (PMC7510185)

**A**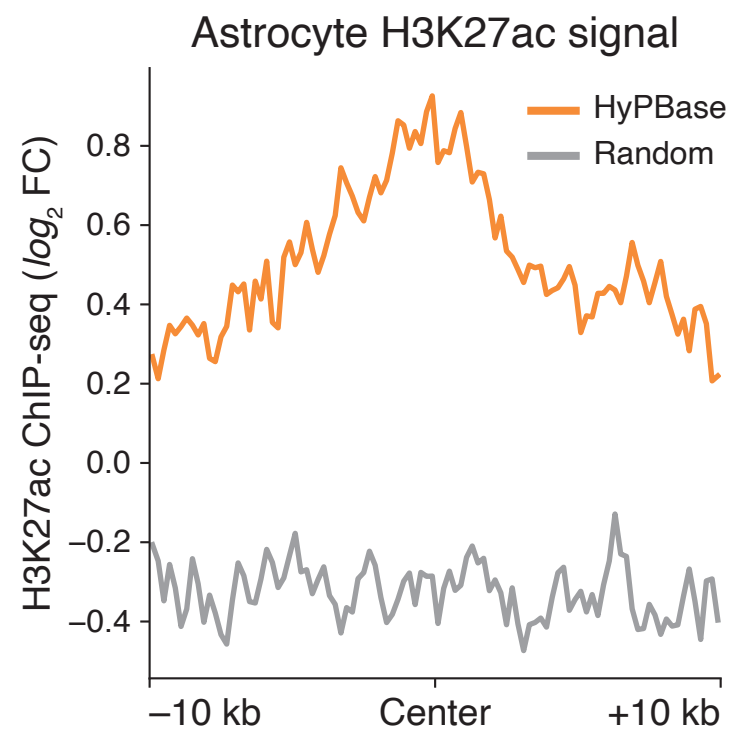**B**

### GO term enrichment for BRD4-bound genes in astrocytes

- detoxification of copper ion (GO:0010273) -
- stress response to copper ion (GO:1990169) -
- regulation of synaptic transmission, glutamatergic (GO:0051966) -
- cerebral cortex development (GO:0021987) -
- neuron migration (GO:0001764) -
- pallium development (GO:0021543) -
- glial cell differentiation (GO:0010001) -
- telencephalon development (GO:0021537) -
- forebrain development (GO:0030900) -
- gliogenesis (GO:0042063) -

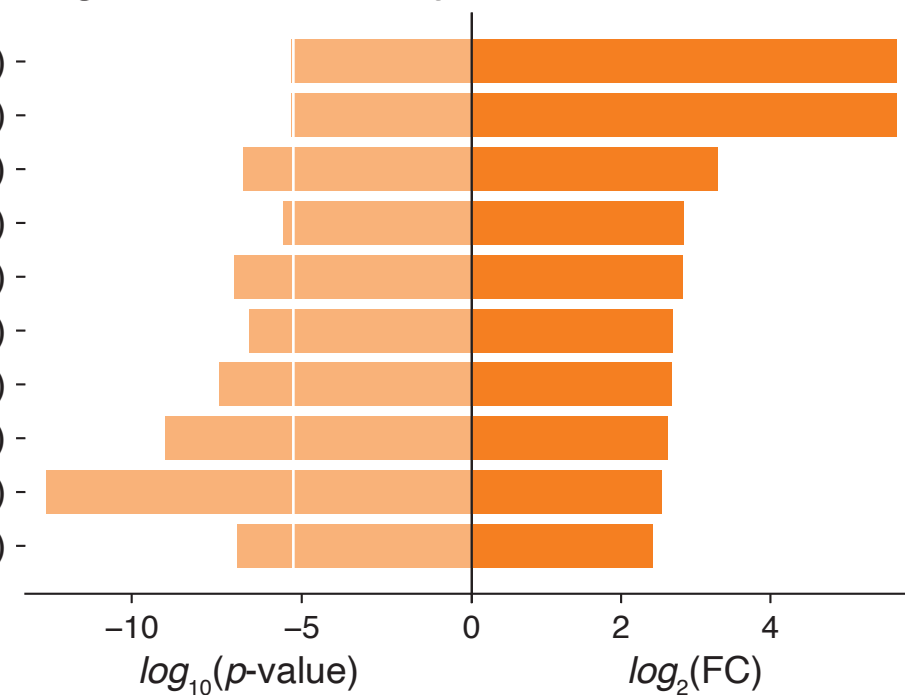**C**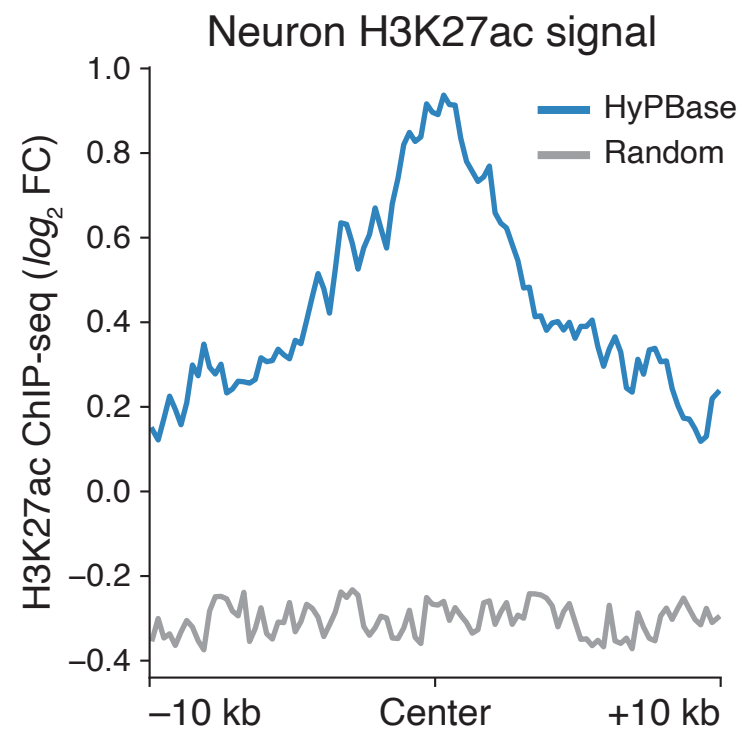**D**

### GO term enrichment for BRD4-bound genes in neurons

- neuron recognition (GO:0008038) -
- regulation of action potential (GO:0098900) -
- cerebral cortex development (GO:0021987) -
- limbic system development (GO:0021761) -
- pallium development (GO:0021543) -
- central nervous system neuron development (GO:0021954) -
- neuron migration (GO:0001764) -
- axon guidance (GO:0007411) -
- neuron projection guidance (GO:0097485) -
- regulation of synapse assembly (GO:0051963) -

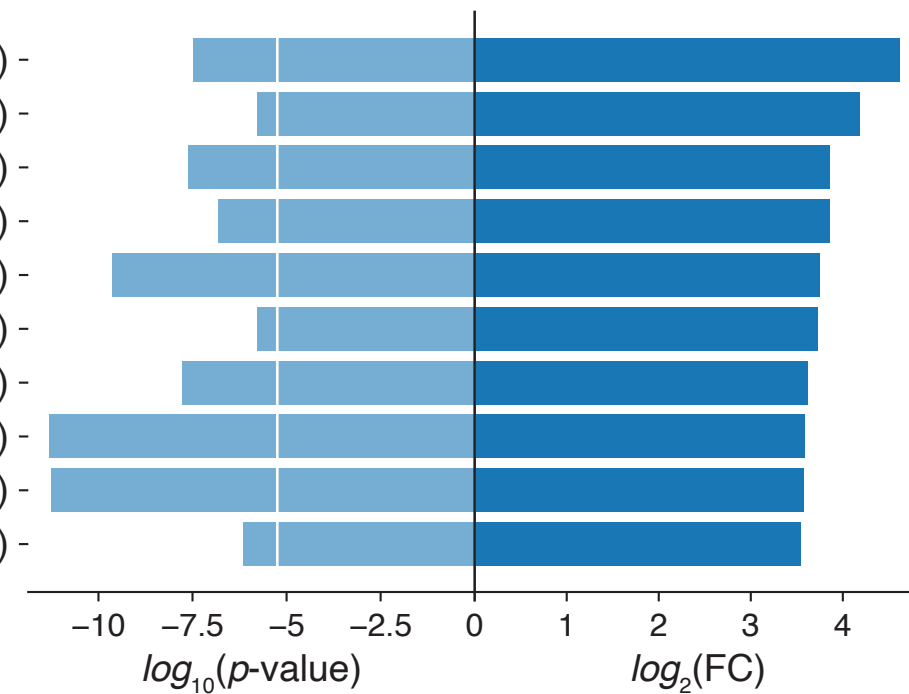

Supplement: NIHMS1608211-supplement-7.pdf [file NIHMS1608211-supplement-7.pdf]
