# Supplementary material
Source: PubMed Central journal article supplement (PMC7510185)
Supplement: NIHMS1608211-supplement-8.pdf [file NIHMS1608211-supplement-8.pdf]

## SUPPLEMENTAL TABLES

**Table S1: Summary of bulk calling cards experiments, related to Figures 1, 2, 4, S1 and Supplemental Methods**

| <b>Sample</b> | <b>Construct</b> | <b>Modality</b>  | <b>Replicates<sup>a</sup></b> | <b>Insertions</b> | <b>Reads</b> | <b>Mean coverage</b> |
|---------------|------------------|------------------|-------------------------------|-------------------|--------------|----------------------|
| HCT-116       | SP1-PBase        | DNA <sup>b</sup> | 1                             | 31,001            | 21,975,948   | 708.9                |
| HCT-116       | SP1-PBase        | RNA <sup>b</sup> | 1                             | 62,500            | 14,993,901   | 239.9                |
| HCT-116       | PBase            | RNA              | 10                            | 1,521,048         | 58,316,389   | 38.3                 |
| HCT-116       | SP1-PBase        | RNA              | 10                            | 410,588           | 35,526,586   | 86.5                 |
| HCT-116       | HyPBase          | RNA              | 12                            | 5,771,207         | 47,572,324   | 8.2                  |
| HCT-116       | SP1-HyPBase      | RNA              | 11                            | 2,029,931         | 40,214,827   | 19.8                 |
| HCT-116       | SB100X           | RNA              | 12                            | 26,515,072        | 67,650,985   | 2.6                  |
| OCM-1A        | HyPBase          | RNA              | 10                            | 5,951,669         | 261,476,361  | 43.9                 |
| OCM-1A        | BAP1-HyPBase     | RNA              | 10                            | 5,740,754         | 293,332,813  | 51.1                 |

<sup>a</sup> Biological replicates. <sup>b</sup> These experiments were used to assess DNA- vs. RNA-based recovery (Figure 1C).

**Table S2: Summary of single cell calling cards experiments, related to Figures 3, 4, 5, 6, 7, S2, S3, S4, S5, S6, and S7**

| <b>Sample</b> | <b>Construct</b> | <b>Libraries</b> | <b>Cells</b> | <b>Insertions</b> | <b>Reads</b> | <b>Mean coverage</b> | <b>Mean IPC</b> | <b>Median IPC</b> | <b>% cells with <math>\geq 1</math> insertion</b> |
|---------------|------------------|------------------|--------------|-------------------|--------------|----------------------|-----------------|-------------------|---------------------------------------------------|
| HCT-116 & N2a | HyPBase          | 1 <sup>a</sup>   | 6,068        | 33,223            | 1,710,525    | 51.5                 | 5.4             | 4                 | 91.8                                              |
| HCT-116       | HyPBase          | 4 <sup>b</sup>   | 12,891       | 37,774            | 4,768,230    | 126.2                | 3.0             | 2                 | 93.4                                              |
| K562          | HyPBase          | 4 <sup>b</sup>   | 11,912       | 107,385           | 10,404,042   | 96.9                 | 9.5             | 6                 | 96.9                                              |
| HCT-116       | SP1-HyPBase      | 4                | 30,411       | 77,210            | 9,874,157    | 127.9                | 2.6             | 2                 | 83.8                                              |
| K562          | SP1-HyPBase      | 4                | 21,554       | 327,465           | 44,851,070   | 137.0                | 15.3            | 9                 | 95.8                                              |
| HepG2         | HyPBase          | 3                | 17,195       | 144,176           | 20,035,606   | 139.0                | 8.4             | 6                 | 96.1                                              |
| HepG2         | FOXA2-HyPBase    | 3                | 16,623       | 105,000           | 15,677,152   | 149.3                | 6.3             | 4                 | 96.0                                              |
| OCM-1A        | HyPBase          | 3                | 23,978       | 150,707           | 19,794,848   | 131.3                | 6.3             | 4                 | 96.2                                              |
| OCM-1A        | BAP1-HyPBase     | 3                | 19,572       | 215,330           | 27,666,808   | 128.5                | 11.0            | 7                 | 97.6                                              |
| Mouse cortex  | HyPBase          | 9 <sup>c</sup>   | 35,950       | 111,382           | 12,204,369   | 109.6                | 3.1             | 3                 | 73.7                                              |

<sup>a</sup> This library was from a species-mixing experiment (Figures 3B and S2). <sup>b</sup> These libraries were demultiplexed from a cell line-mixing experiment (Figures 3C-D and S3). <sup>c</sup> This experiment is further stratified by cell type in Table S3. IPC: insertions per cell.

**Table S3: Breakdown of cortical cell types and scCC HyPBase insertions per cluster, related to Figures 6, 7, and S7**

| <b>Cluster</b>             | <b>Cells</b> | <b>Insertions</b> | <b>Mean IPC</b> |
|----------------------------|--------------|-------------------|-----------------|
| Astrocyte                  | 4,727        | 16,791            | 3.6             |
| Astro_Neuron_Doublet       | 394          | 1,653             | 4.2             |
| Ependymal                  | 107          | 153               | 1.4             |
| Microglia                  | 569          | 238               | 0.4             |
| Neuroblast_SVZ             | 369          | 1,084             | 2.9             |
| Neuron_Cajal-Retzius       | 552          | 4,363             | 7.9             |
| Neuron_Excit_AON           | 1,939        | 8,190             | 4.2             |
| Neuron_Excit_Indeterminate | 3,660        | 6,377             | 1.7             |
| Neuron_Excit_L2-4          | 9,083        | 29,465            | 3.2             |
| Neuron_Excit_L5            | 5,544        | 26,437            | 4.8             |
| Neuron_Excit_L6            | 1,436        | 5,169             | 3.6             |
| Neuron_Granule_DG          | 535          | 1,674             | 3.1             |
| Neuron_Inhibitory          | 2,409        | 6,564             | 2.7             |
| Oligo_Mature               | 2,740        | 1,729             | 0.6             |
| Oligo_NewlyForming         | 959          | 674               | 0.7             |
| Oligo_Progenitor           | 504          | 477               | 0.9             |
| Vascular_endothelial       | 196          | 69                | 0.4             |
| Vascular_meningeal         | 227          | 275               | 1.2             |

IPC: insertions per cell.

**Table S4: Oligonucleotides referenced in this work, related to STAR Methods**

| Name                            | Sequence                                                                             | Purification    | Notes                                                                                                 |
|---------------------------------|--------------------------------------------------------------------------------------|-----------------|-------------------------------------------------------------------------------------------------------|
| SMART_dT18VN                    | AAGCAGTGGTATCAACGCAGAGTACGTTTTTTTTTTTTTTTTTTTTTTTTTTTTTTTTTTTTVN                     | Standard desalt | RT primer for bulk RNA calling card recovery                                                          |
| SMART                           | AAGCAGTGGTATCAACGCAGAGT                                                              | Standard desalt | PCR primer for bulk RNA calling card amplification                                                    |
| SRT_PAC_F1                      | CAACCTCCCCTTCTACGAGC                                                                 | Standard desalt | Puromycin marker in SRT                                                                               |
| SRT_tdTomato_F1                 | TCCTGTACGGCATGGACGAG                                                                 | Standard desalt | tdTomato marker in SRT                                                                                |
| Raff_ACTB_F                     | CCTCGCCTTTGCCGATCCG                                                                  | Standard desalt | Human ACTB primer (for RT control)                                                                    |
| Raff_ACTB_R                     | GGATCTTCATGAGGTAGTCAGTCAGGTCC                                                        | Standard desalt | Human ACTB primer (for RT control)                                                                    |
| OM-PB-ACG                       | AATGATACGGCGACCACCGAGATCTACACTCTTTCCCTACACGACGCTCTTCCGATCTACGTTTACGCAGACTATCTTTCTAG  | Standard desalt | For use with <i>piggyBac</i> SRTs                                                                     |
| OM-PB-CTA                       | AATGATACGGCGACCACCGAGATCTACACTCTTTCCCTACACGACGCTCTTCCGATCTCTATTTACGCAGACTATCTTTCTAG  | Standard desalt | For use with <i>piggyBac</i> SRTs                                                                     |
| OM-PB-GAT                       | AATGATACGGCGACCACCGAGATCTACACTCTTTCCCTACACGACGCTCTTCCGATCTGATTTTACGCAGACTATCTTTCTAG  | Standard desalt | For use with <i>piggyBac</i> SRTs                                                                     |
| OM-PB-TGC                       | AATGATACGGCGACCACCGAGATCTACACTCTTTCCCTACACGACGCTCTTCCGATCTTGCTTTTACGCAGACTATCTTTCTAG | Standard desalt | For use with <i>piggyBac</i> SRTs                                                                     |
| OM-PB-TAG                       | AATGATACGGCGACCACCGAGATCTACACTCTTTCCCTACACGACGCTCTTCCGATCTTAGTTTACGCAGACTATCTTTCTAG  | Standard desalt | For use with <i>piggyBac</i> SRTs                                                                     |
| OM-PB-ATC                       | AATGATACGGCGACCACCGAGATCTACACTCTTTCCCTACACGACGCTCTTCCGATCTATCTTTTACGCAGACTATCTTTCTAG | Standard desalt | For use with <i>piggyBac</i> SRTs                                                                     |
| OM-PB-CGT                       | AATGATACGGCGACCACCGAGATCTACACTCTTTCCCTACACGACGCTCTTCCGATCTCGTTTTTACGCAGACTATCTTTCTAG | Standard desalt | For use with <i>piggyBac</i> SRTs                                                                     |
| OM-PB-GCA                       | AATGATACGGCGACCACCGAGATCTACACTCTTTCCCTACACGACGCTCTTCCGATCTGCATTTTACGCAGACTATCTTTCTAG | Standard desalt | For use with <i>piggyBac</i> SRTs                                                                     |
| OM-SB-ACG                       | AATGATACGGCGACCACCGAACACTCTTTCCCTACACGACGCTCTTCCGATCTACGTAAGTGTATGTAAACTTCCGACTTCAA  | Standard desalt | For use with <i>Sleeping Beauty</i> SRTs                                                              |
| OM-SB-CTA                       | AATGATACGGCGACCACCGAACACTCTTTCCCTACACGACGCTCTTCCGATCTCTATAAGTGTATGTAAACTTCCGACTTCAA  | Standard desalt | For use with <i>Sleeping Beauty</i> SRTs                                                              |
| OM-SB-GAT                       | AATGATACGGCGACCACCGAACACTCTTTCCCTACACGACGCTCTTCCGATCTGATTAAGTGTATGTAAACTTCCGACTTCAA  | Standard desalt | For use with <i>Sleeping Beauty</i> SRTs                                                              |
| OM-SB-TGC                       | AATGATACGGCGACCACCGAACACTCTTTCCCTACACGACGCTCTTCCGATCTTGCTAAGTGTATGTAAACTTCCGACTTCAA  | Standard desalt | For use with <i>Sleeping Beauty</i> SRTs                                                              |
| OM-SB-TAG                       | AATGATACGGCGACCACCGAACACTCTTTCCCTACACGACGCTCTTCCGATCTTAGTAAGTGTATGTAAACTTCCGACTTCAA  | Standard desalt | For use with <i>Sleeping Beauty</i> SRTs                                                              |
| OM-SB-ATC                       | AATGATACGGCGACCACCGAACACTCTTTCCCTACACGACGCTCTTCCGATCTATCTAAGTGTATGTAAACTTCCGACTTCAA  | Standard desalt | For use with <i>Sleeping Beauty</i> SRTs                                                              |
| OM-SB-CGT                       | AATGATACGGCGACCACCGAACACTCTTTCCCTACACGACGCTCTTCCGATCTCGTTAAGTGTATGTAAACTTCCGACTTCAA  | Standard desalt | For use with <i>Sleeping Beauty</i> SRTs                                                              |
| OM-SB-GCA                       | AATGATACGGCGACCACCGAACACTCTTTCCCTACACGACGCTCTTCCGATCTGCATAAGTGTATGTAAACTTCCGACTTCAA  | Standard desalt | For use with <i>Sleeping Beauty</i> SRTs                                                              |
| N7 indexed primer               | CAAGCAGAAGACGGCATAACGAGAT [ index ]GTCTCGTGGGCTCGG                                   | Standard desalt | Uniquely identifies each bulk RNA calling card library in conjunction with barcoded transposon primer |
| 10x_TSO                         | AAGCAGTGGTATCAACGCAGAGTACATrGrGrG                                                    | Standard desalt | For continuing 10x scRNA-seq prep after splitting first RT product in half                            |
| Bio_Illumina_Seq1_scCC_10X_3xPT | /5Phos/ACACTCTTTCCC/iBiodT/ACACGACGCTCTTCCGA*T*C*T                                   | HPLC            | Single cell calling card primer for use with 10x Chromium 3' v2 kit                                   |
| Bio_Long_PB_LTR_3xPT            | /5Phos/GCGTCAATTTTACGCAGAC/iBiodT/ATCTTTC*T*A*G                                      | HPLC            | Single cell calling card primer for use with <i>piggyBac</i> SRTs                                     |

|                     |                                                                         |                 |                                                                                          |
|---------------------|-------------------------------------------------------------------------|-----------------|------------------------------------------------------------------------------------------|
| scCC_P5_adapter     | AATGATACGGCGACCACCGAGATCTTCACTCATTCCACACGACTCCTTGCCAGTCTC*T             | Standard desalt | Adapter for scCC (needs to be pre-annealed with scCC_P7_adapter)                         |
| scCC_P7_adapter     | /5Phos/GAGACTGGCAAGTACACGTCGCACTCACCATGA[index]ATCTCGTATGCCGCTTTCTGCTTG | Standard desalt | Adapter for scCC (needs to be pre-annealed with scCC_P5_adapter)                         |
| scCC_P5_primer      | AATGATACGGCGACCACCGAGATC                                                | Standard desalt | For final scCC library PCR                                                               |
| scCC_P7_primer      | CAAGCAGAAGACGGCATAACGAGAT                                               | Standard desalt | For final scCC library PCR                                                               |
| scCC_PB_CustomRead2 | CGTGTAGGGAAAGAGTGTGCGTCAATTTTACGCAGACTATCTTTCTAG                        | PAGE            | For custom sequencing of <i>piggyBac</i> scCC libraries; read 2 should begin with GGTTAA |
| scCC_CustomIndex1   | GAGACTGGCAAGTACACGTCGCACTCACCATGA                                       | PAGE            | For custom sequencing of scCC libraries                                                  |
| ACTB_PrimerBank_F   | CATGTACGTTGCTATCCAGGC                                                   | Standard desalt | For qRT-PCR                                                                              |
| ACTB_PrimerBank_R   | CTCCTTAATGTCACGCACGAT                                                   | Standard desalt | For qRT-PCR                                                                              |
| CD24_PrimerBank_F   | CTCCTACCCACGCAGATTTATTC                                                 | Standard desalt | For qRT-PCR                                                                              |
| CD24_PrimerBank_R   | AGAGTGAGACCACGAAGAGAC                                                   | Standard desalt | For qRT-PCR                                                                              |
| MYC_PrimerBank_F    | GTCAAGAGGCGAACACACAAC                                                   | Standard desalt | For qRT-PCR                                                                              |
| MYC_PrimerBank_R    | TTGGACGGACAGGATGTATGC                                                   | Standard desalt | For qRT-PCR                                                                              |
| BRD2_PrimerBank_F   | AATGGCACAAACGCTGGAAAA                                                   | Standard desalt | For qRT-PCR                                                                              |
| BRD2_PrimerBank_R   | CACTGGTAACACTGCCCTG                                                     | Standard desalt | For qRT-PCR                                                                              |
| BRD3_PrimerBank_F   | TGCAAGCGAATGTATGCAGGA                                                   | Standard desalt | For qRT-PCR                                                                              |
| BRD3_PrimerBank_R   | CATCTGGGCCACTTTTGTAGAA                                                  | Standard desalt | For qRT-PCR                                                                              |
| BRD4_PrimerBank_F   | GAGCTACCCACAGAAGAAACC                                                   | Standard desalt | For qRT-PCR                                                                              |
| BRD4_PrimerBank_R   | GAGTCGATGCTTGAGTTGTGTT                                                  | Standard desalt | For qRT-PCR                                                                              |
| BRD4 CRISPRi gRNA   | GCGGCTGCCGGCGGTGCCCG                                                    | N/A             | For knockdown of BRD4 with CRISPRi                                                       |
| NT CRISPRi gRNA     | GGAGGCGAGGTAAGACGCGG                                                    | N/A             | Control non-targeting gRNA for CRISPRi                                                   |
