# Supplementary material
Source: PubMed Central journal article supplement (PMC7510185)

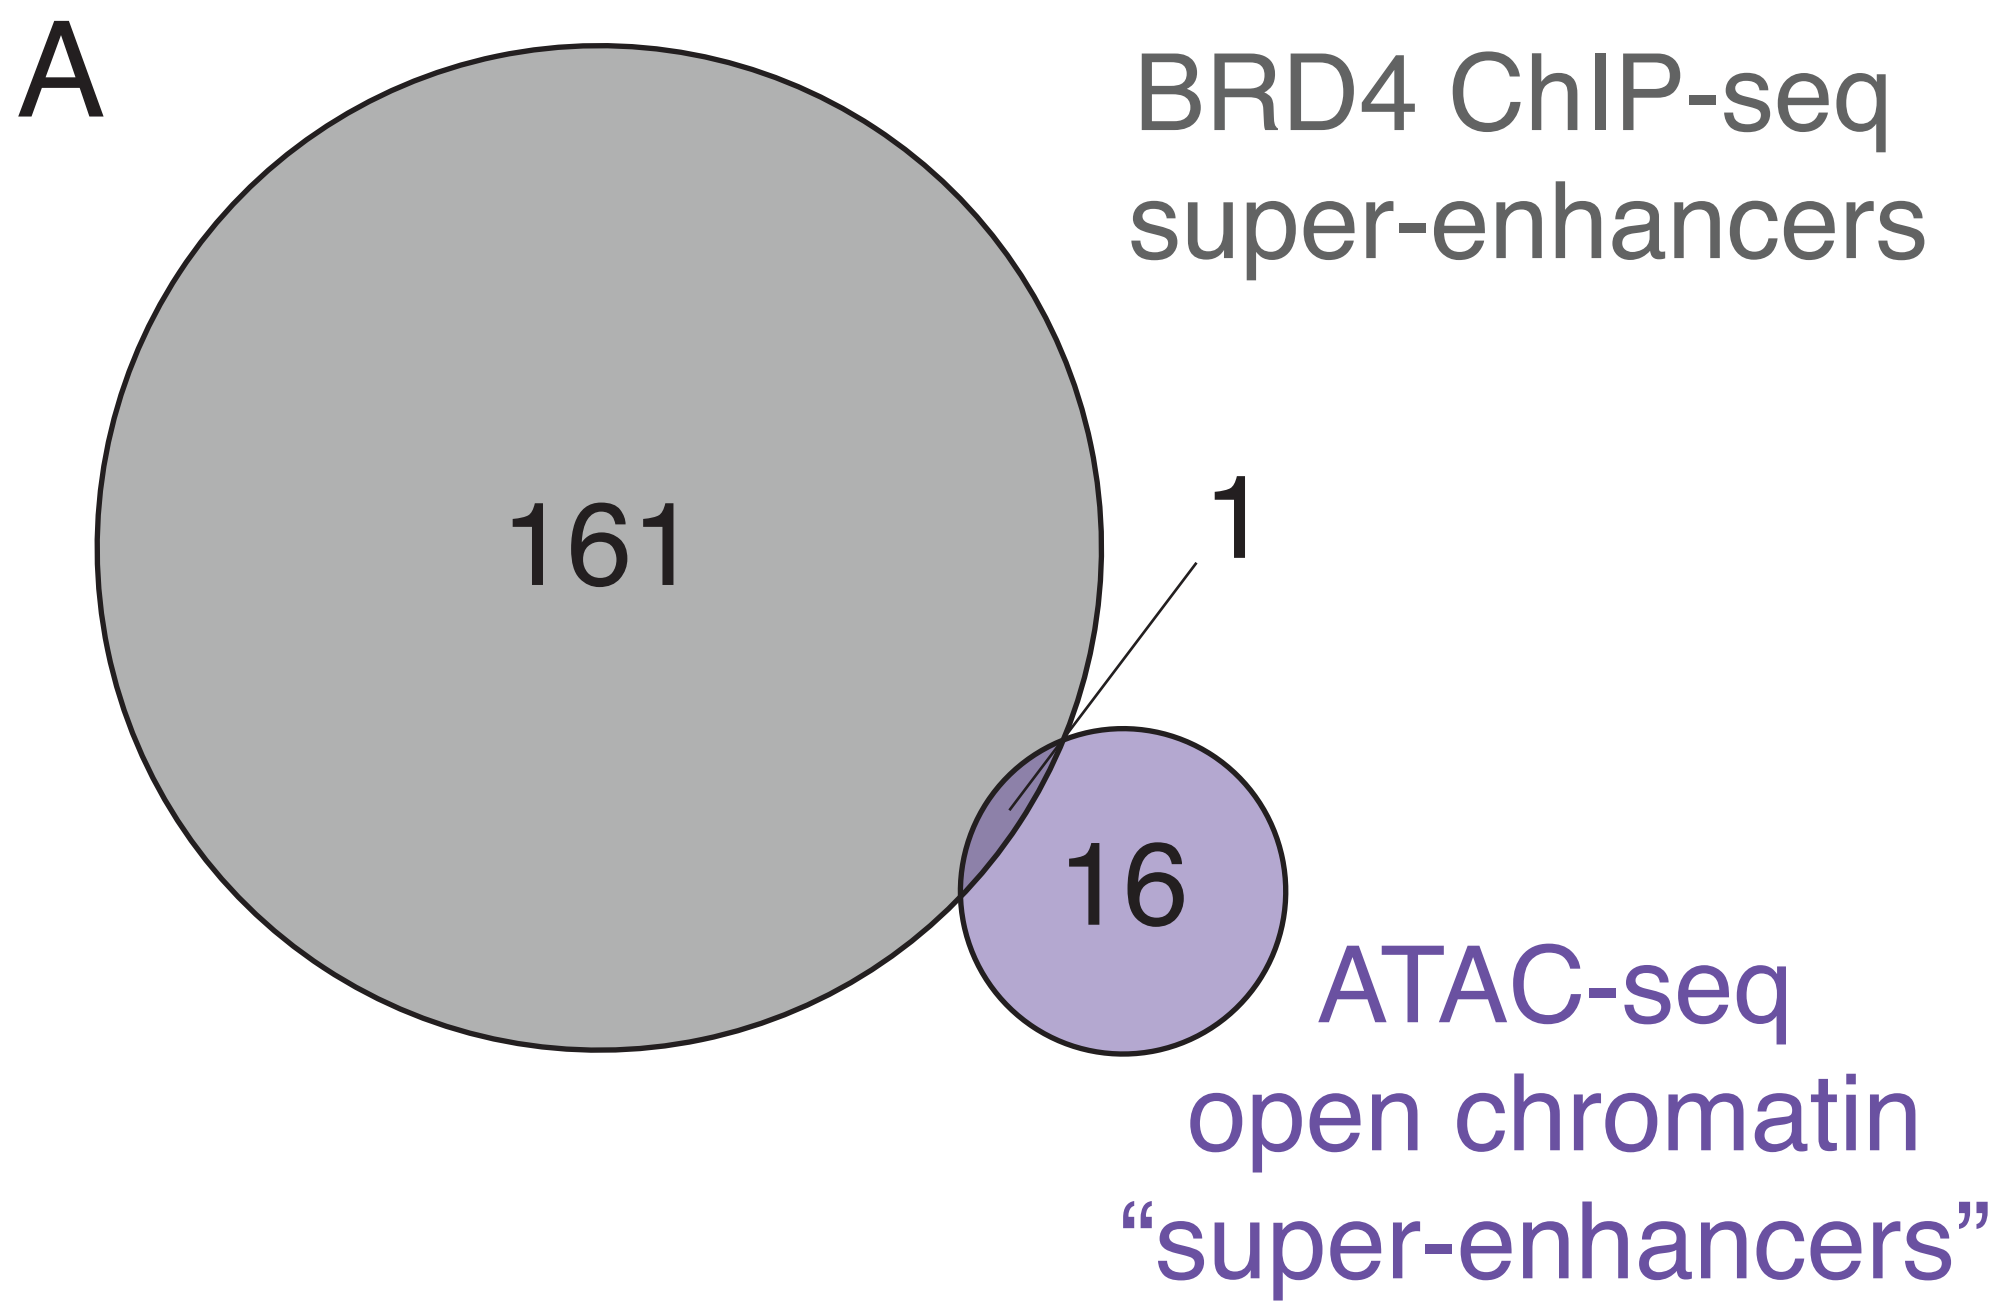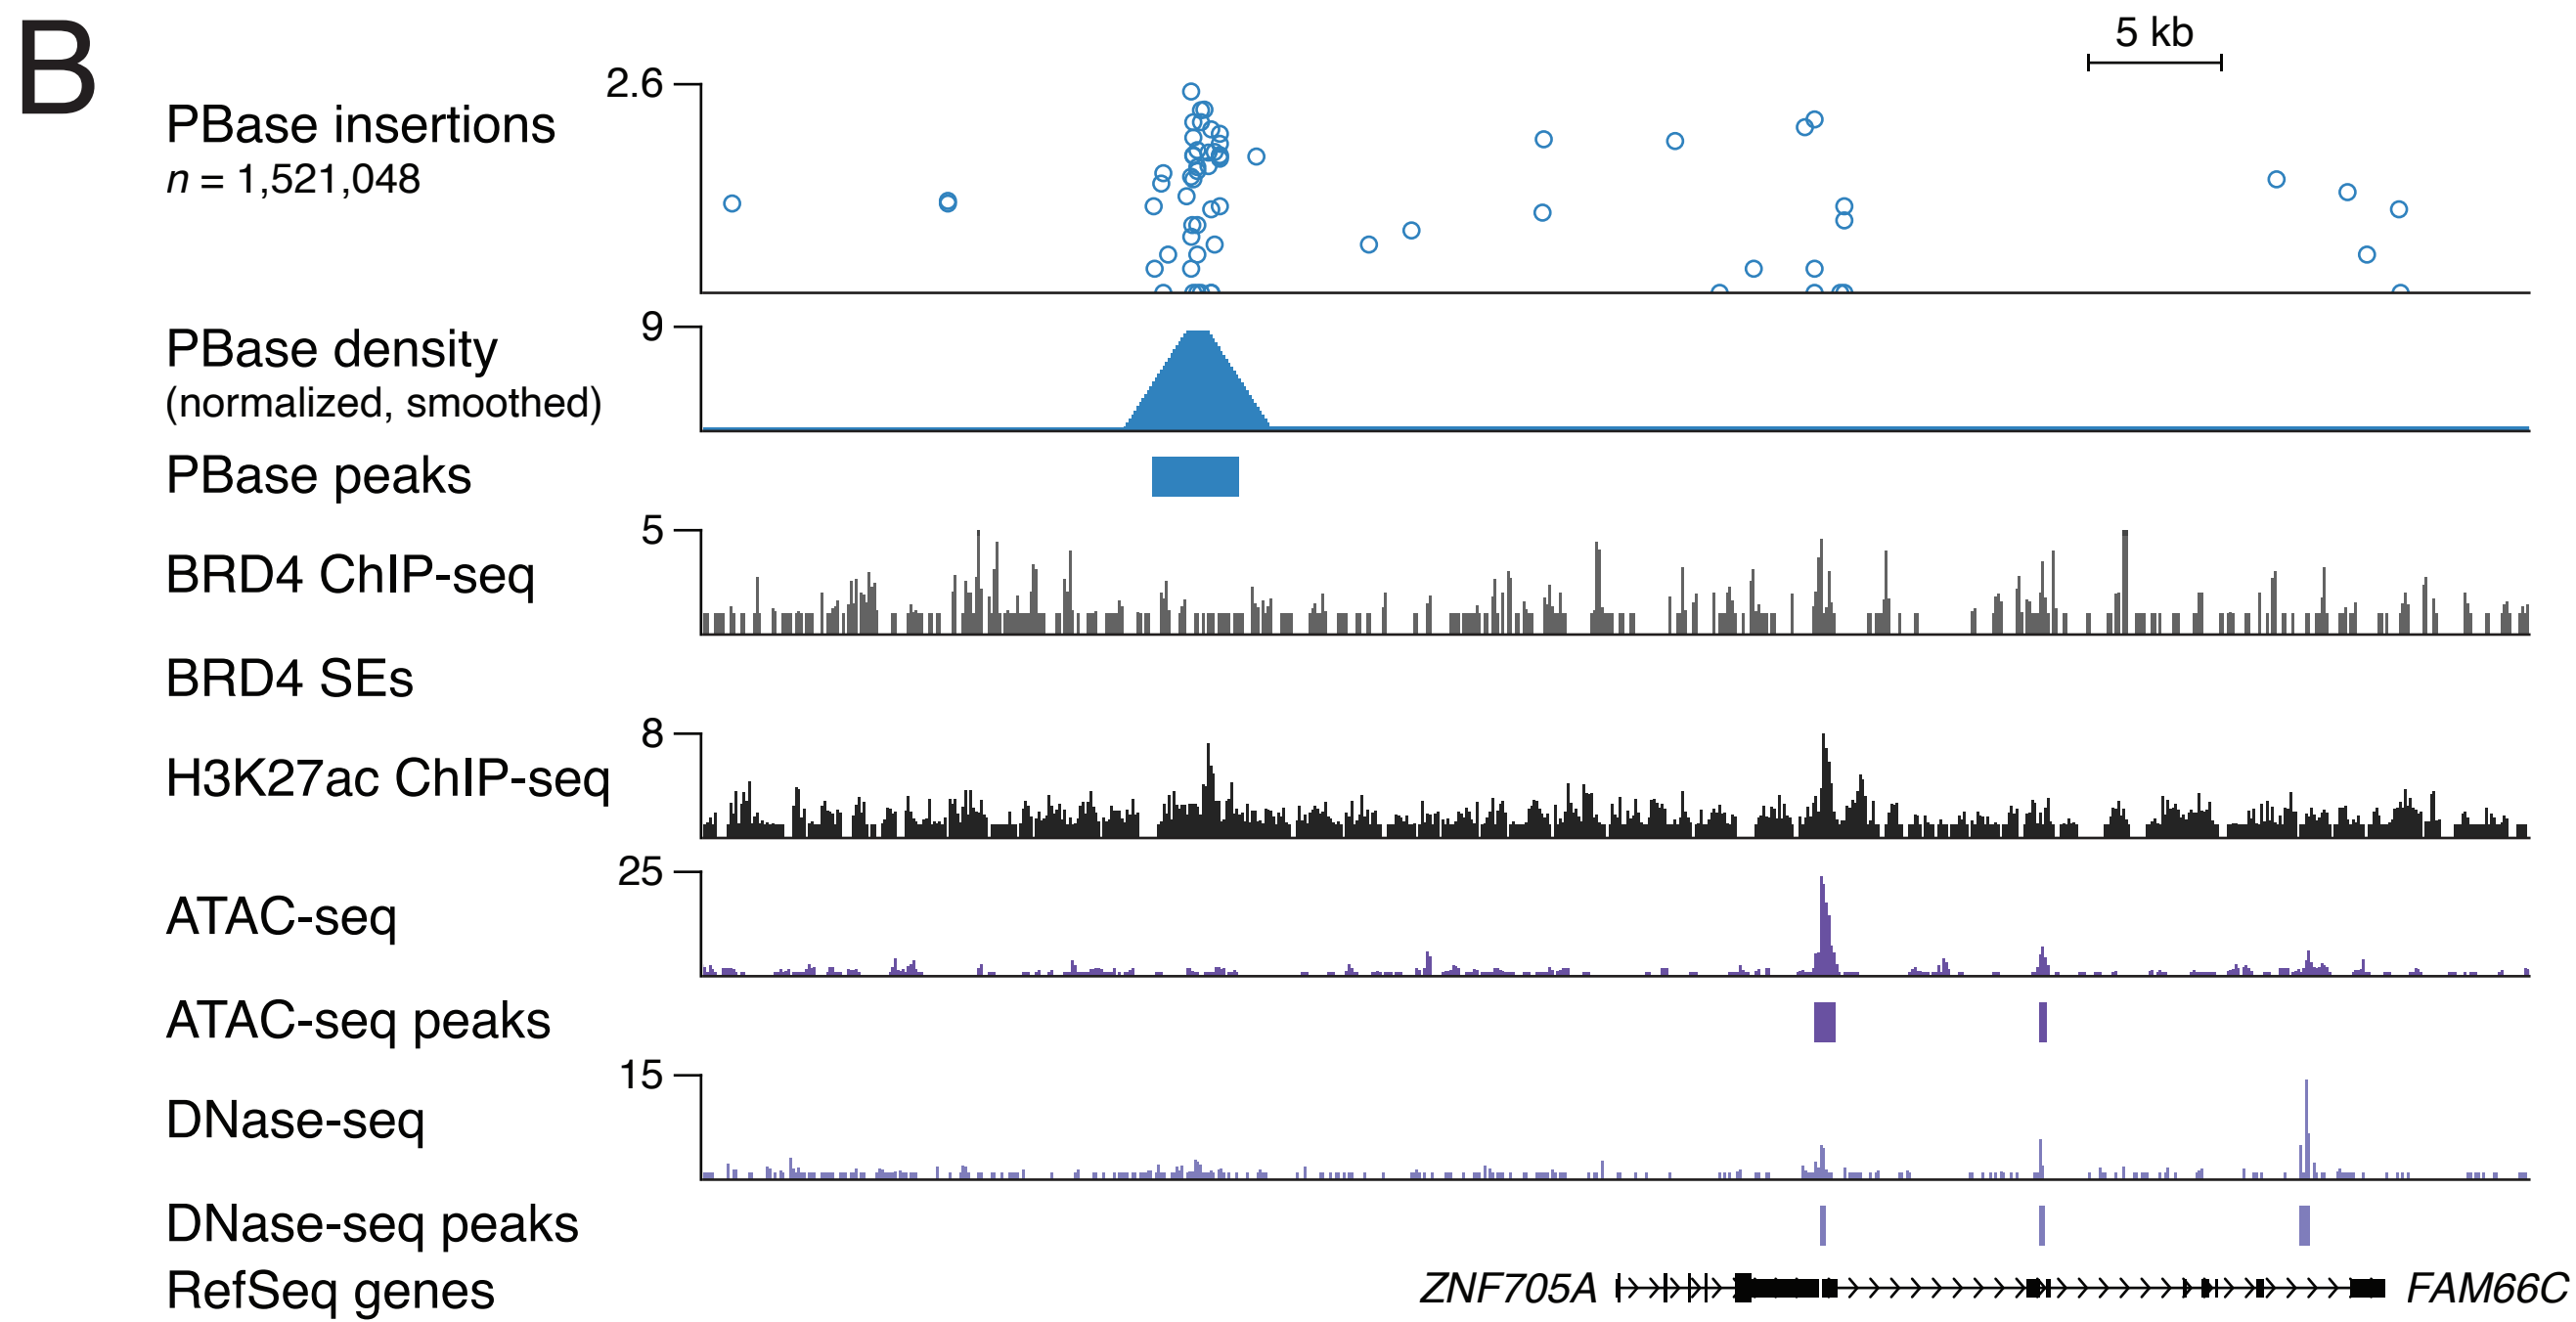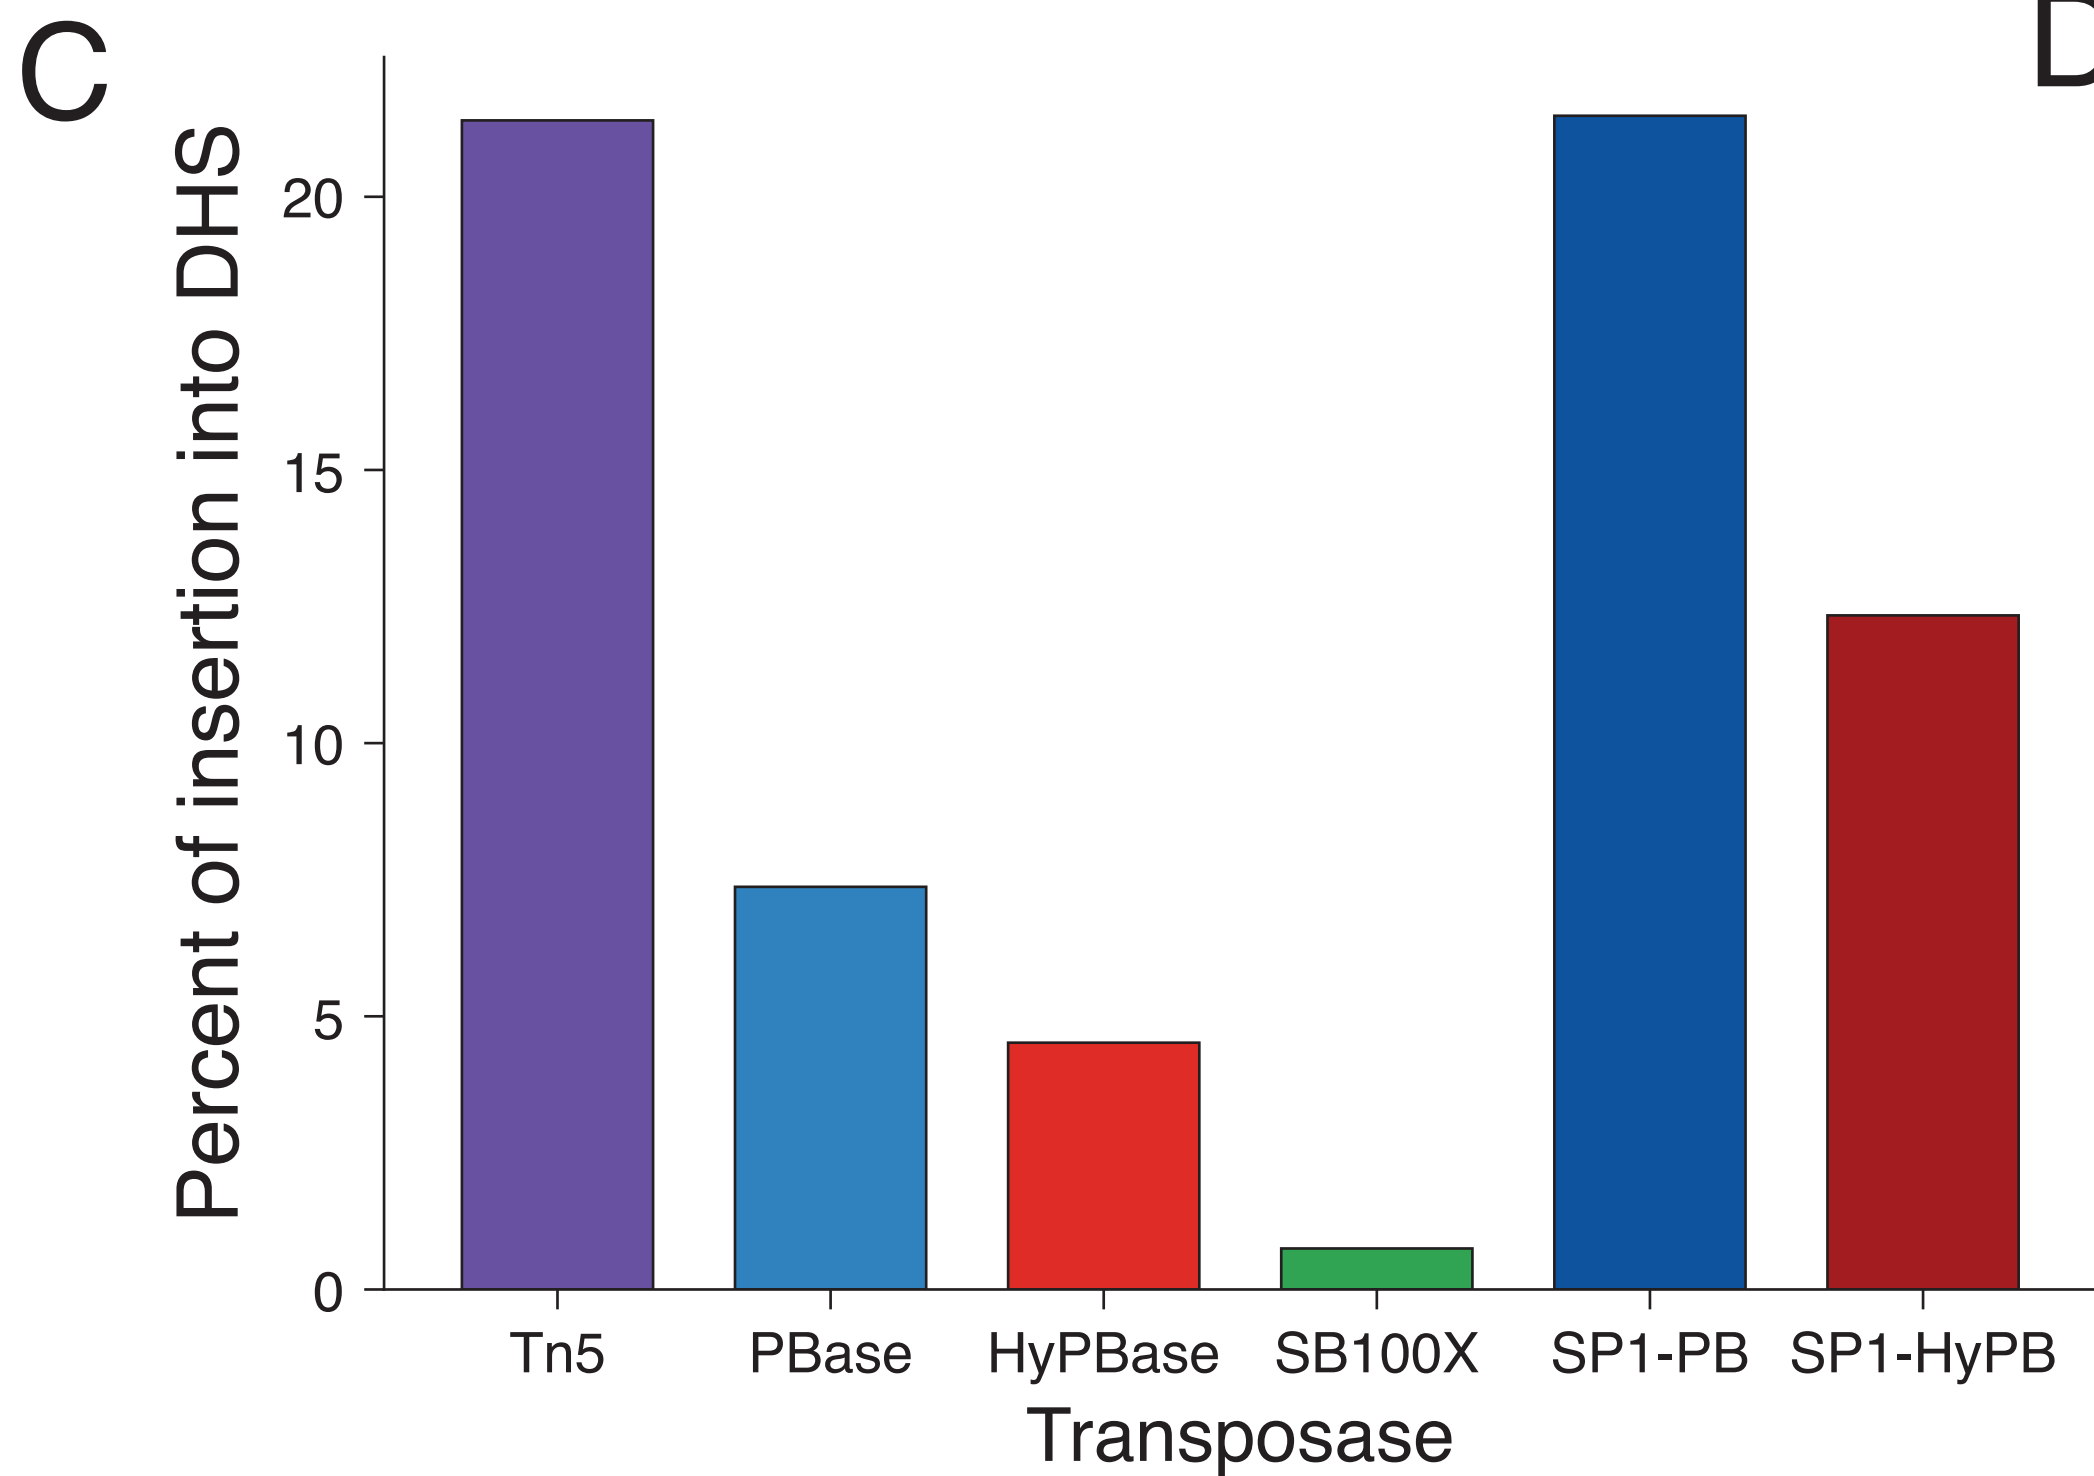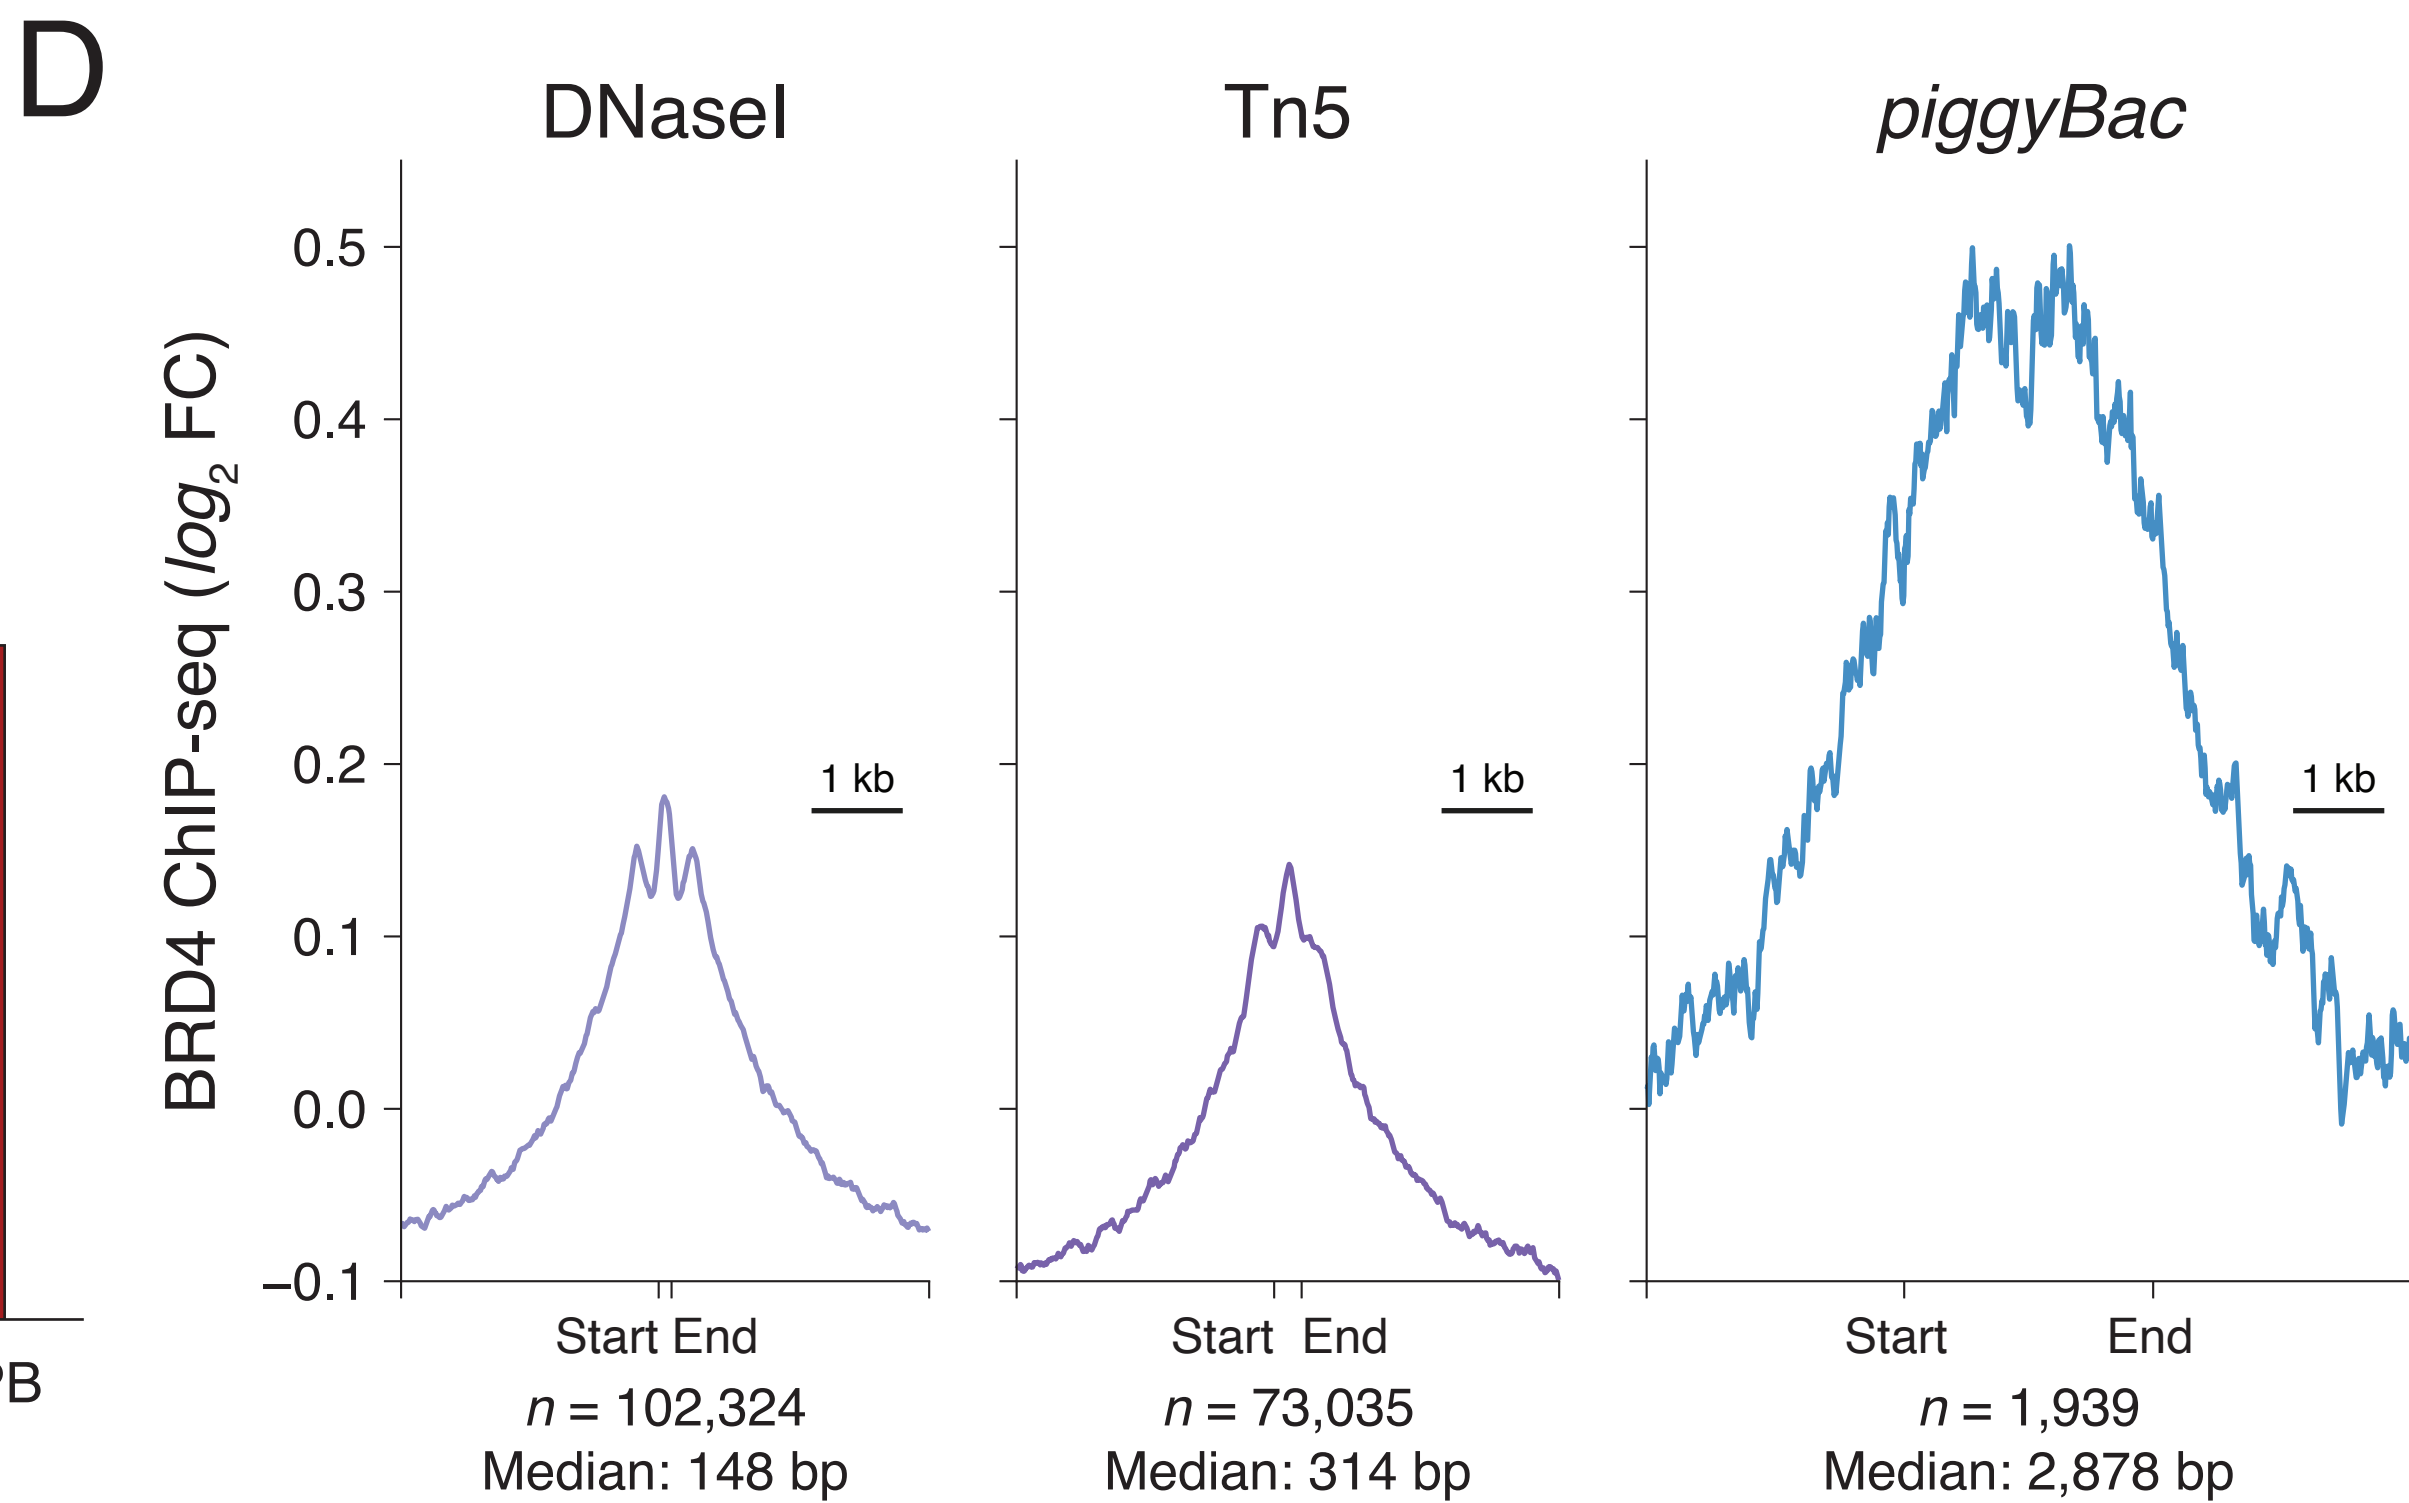

Supplement: NIHMS1608211-supplement-1.pdf [file NIHMS1608211-supplement-1.pdf]

**A**

## Species mixing scRNA-seq

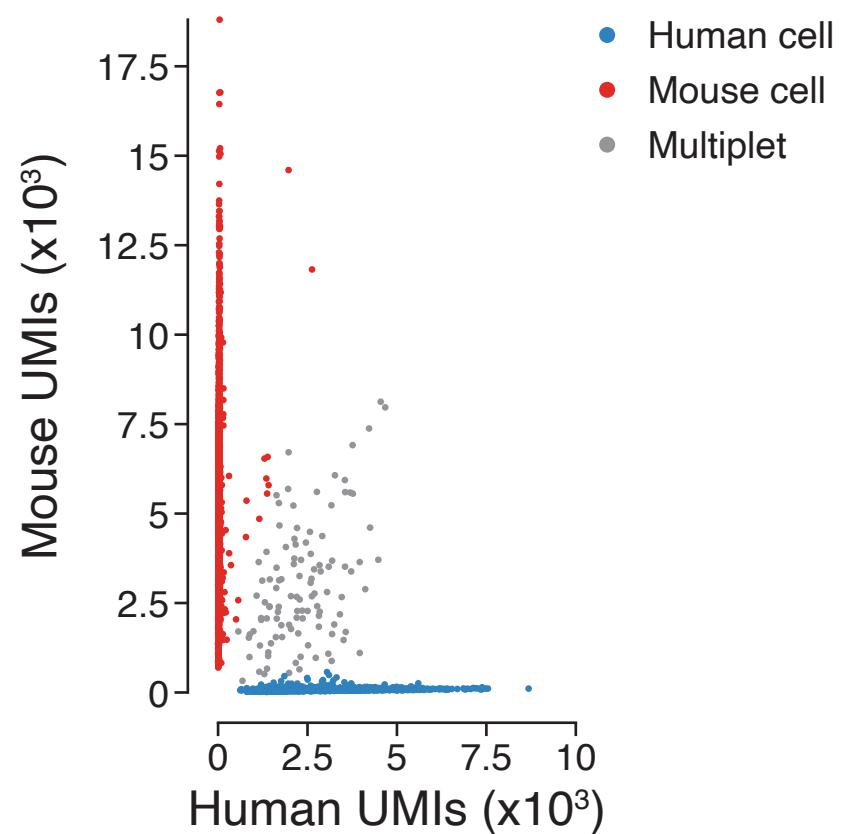**B**

## SRT-derived transcripts (raw)

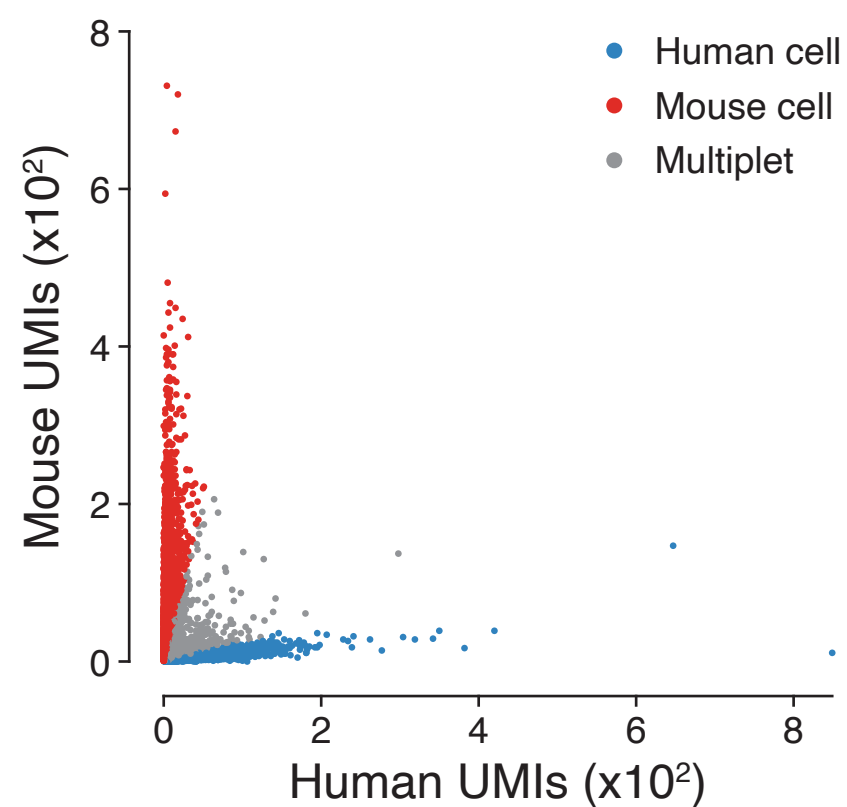**C**

## Before filtering

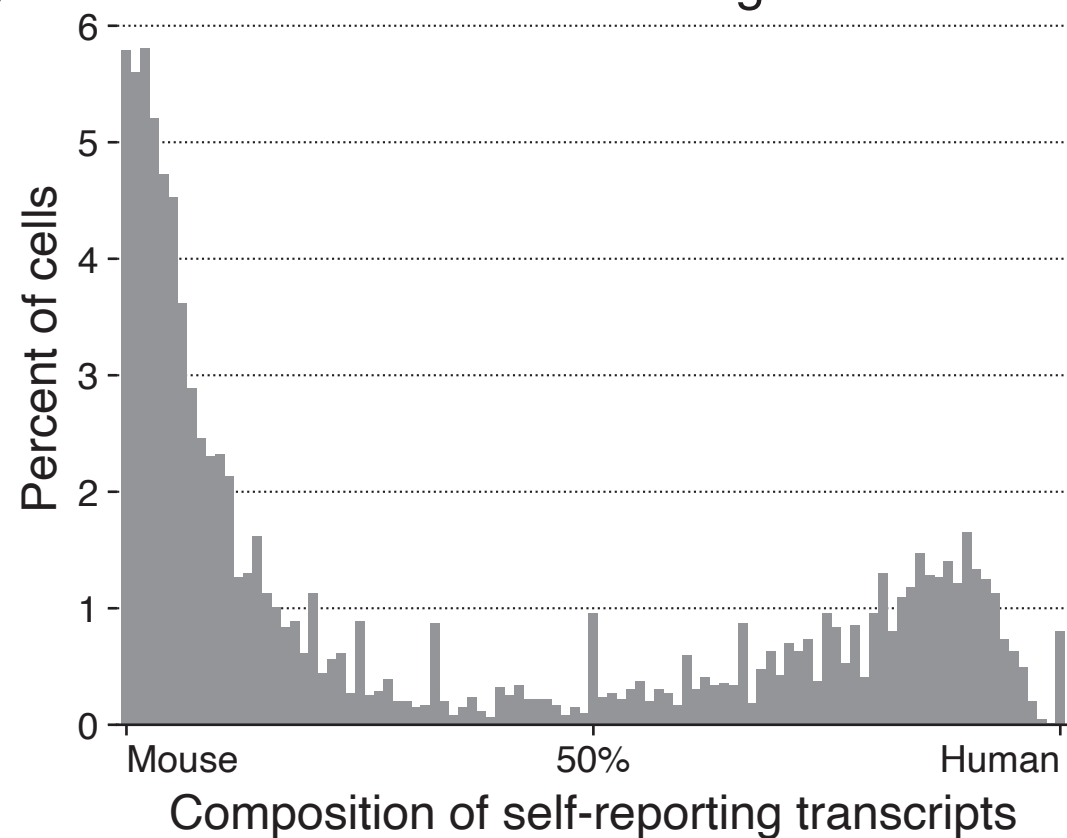**D**

## After filtering

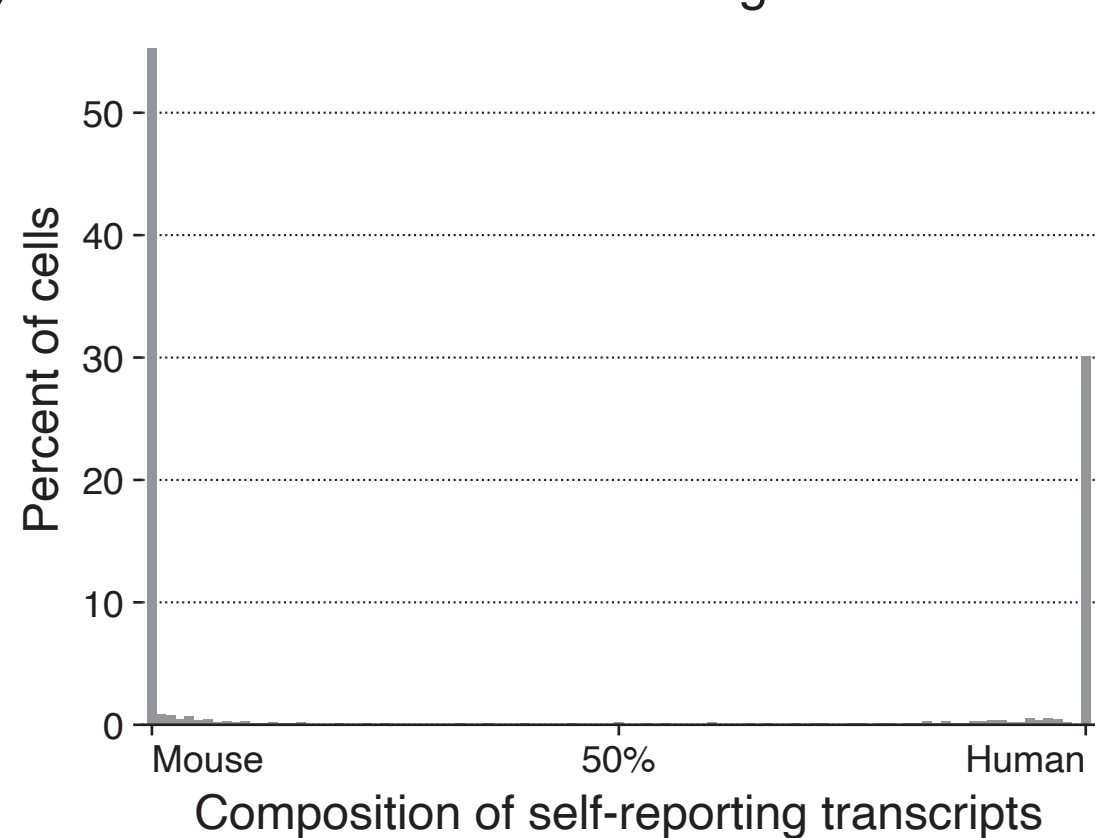

Supplement: NIHMS1608211-supplement-2.pdf [file NIHMS1608211-supplement-2.pdf]

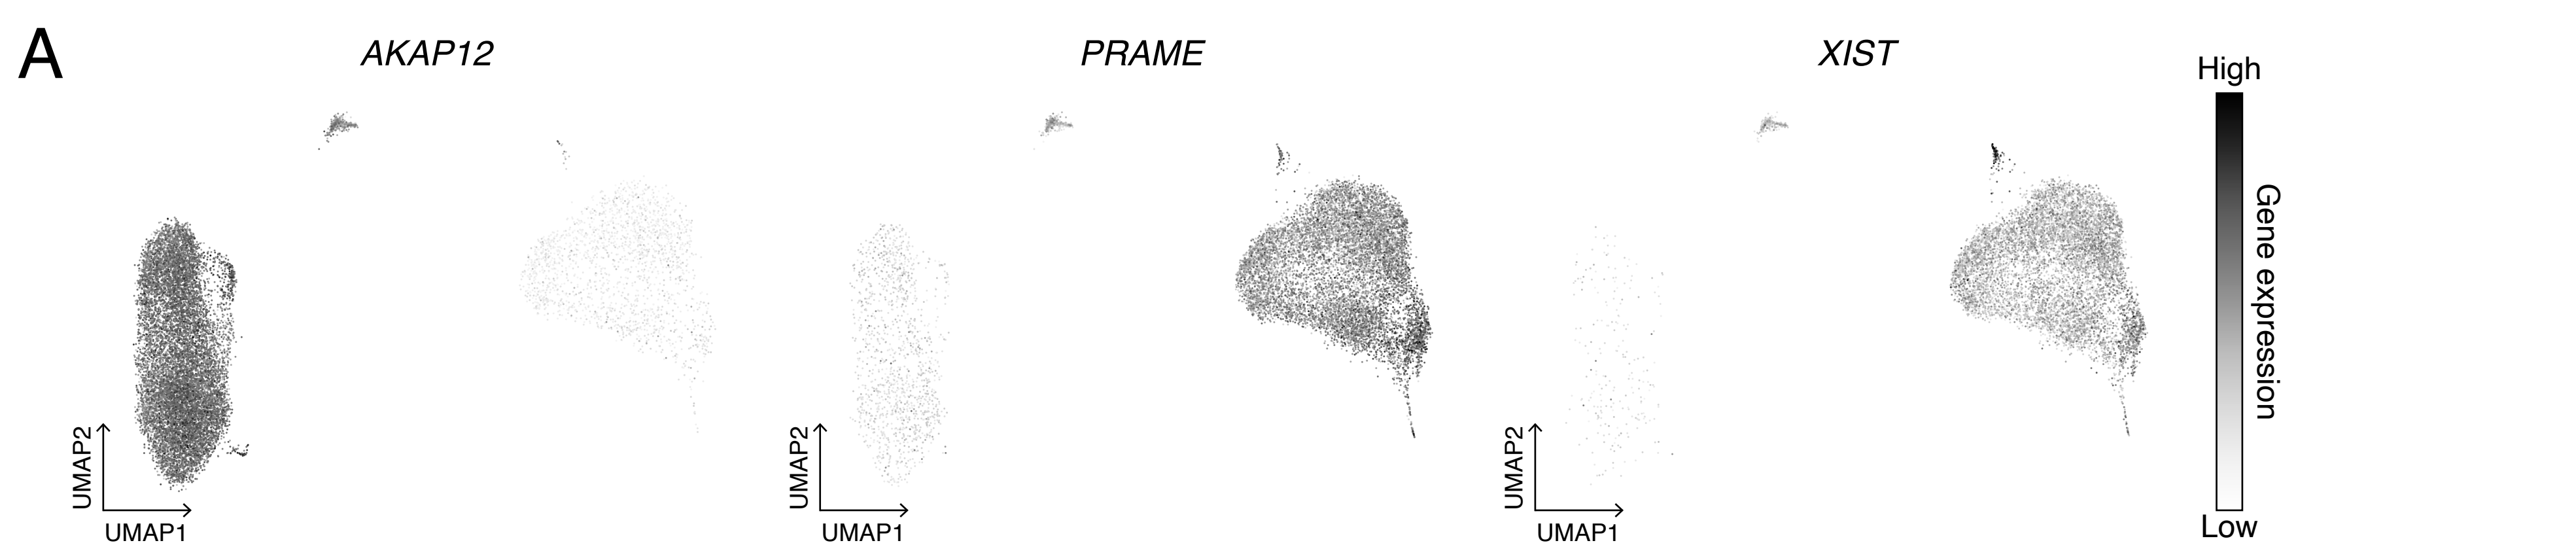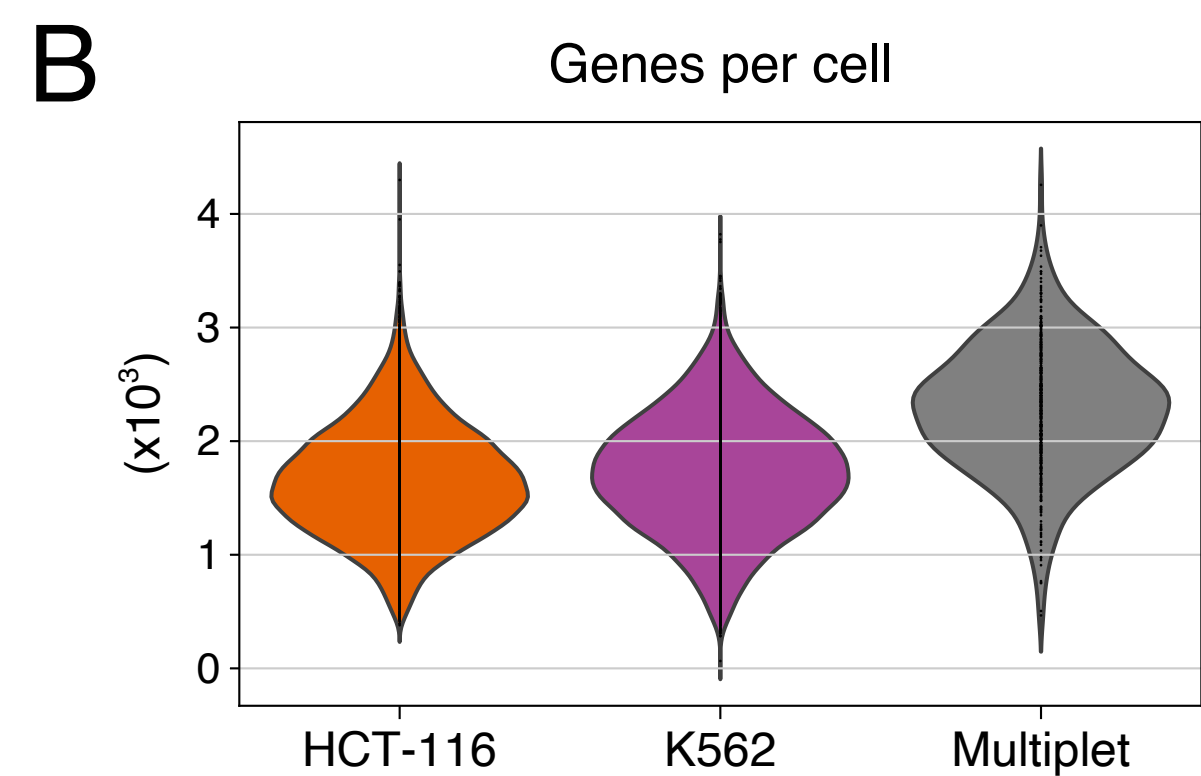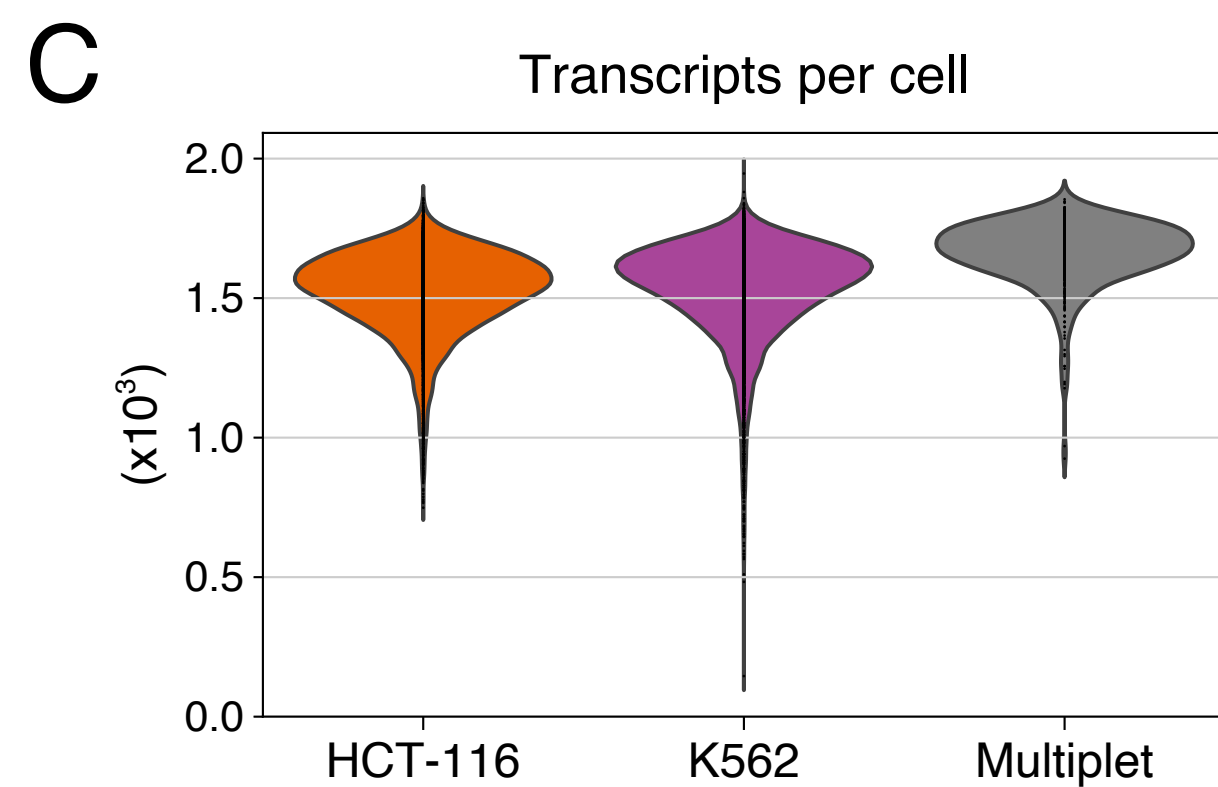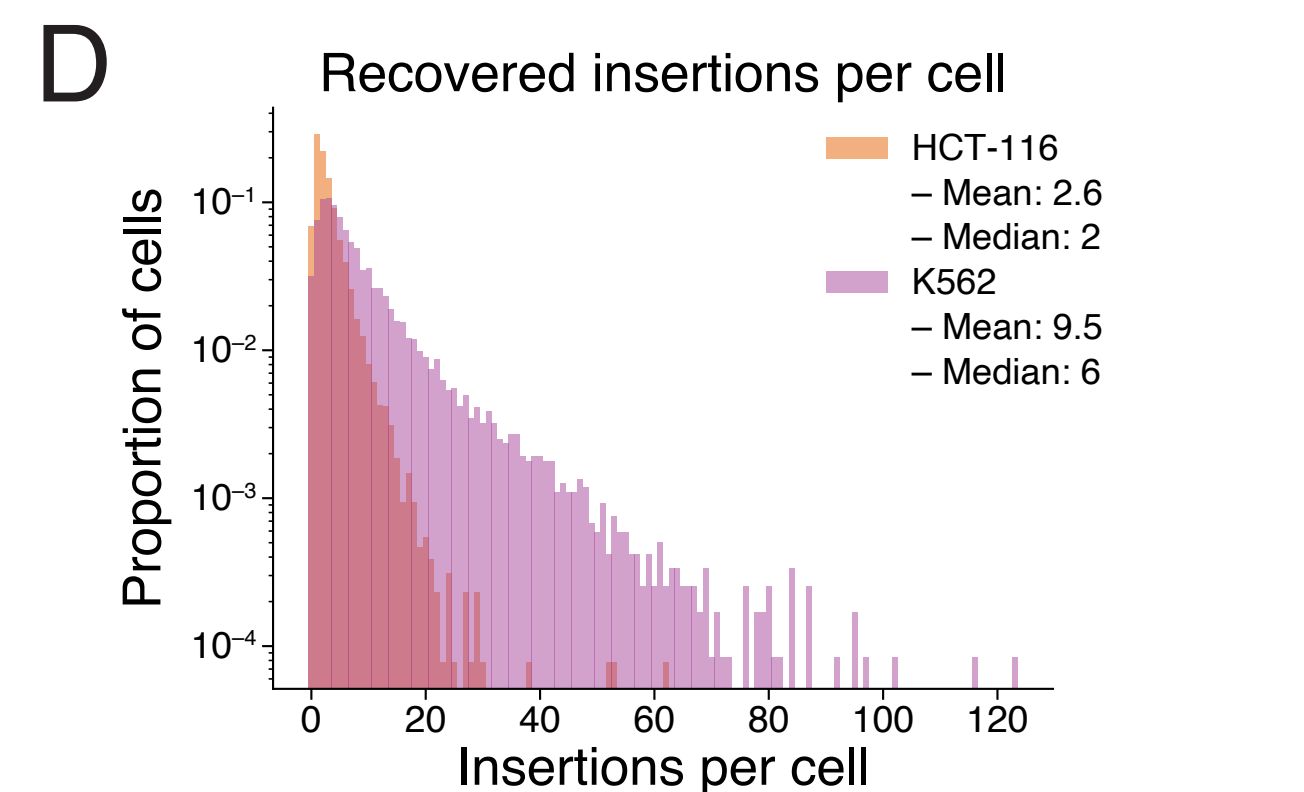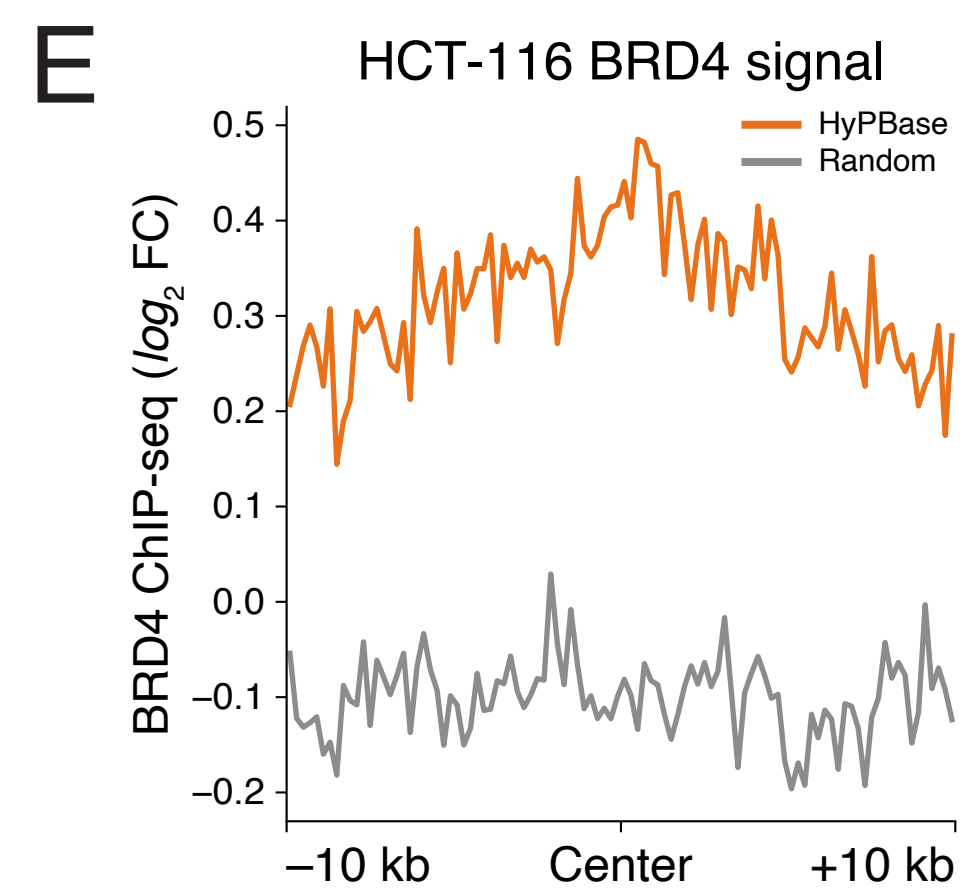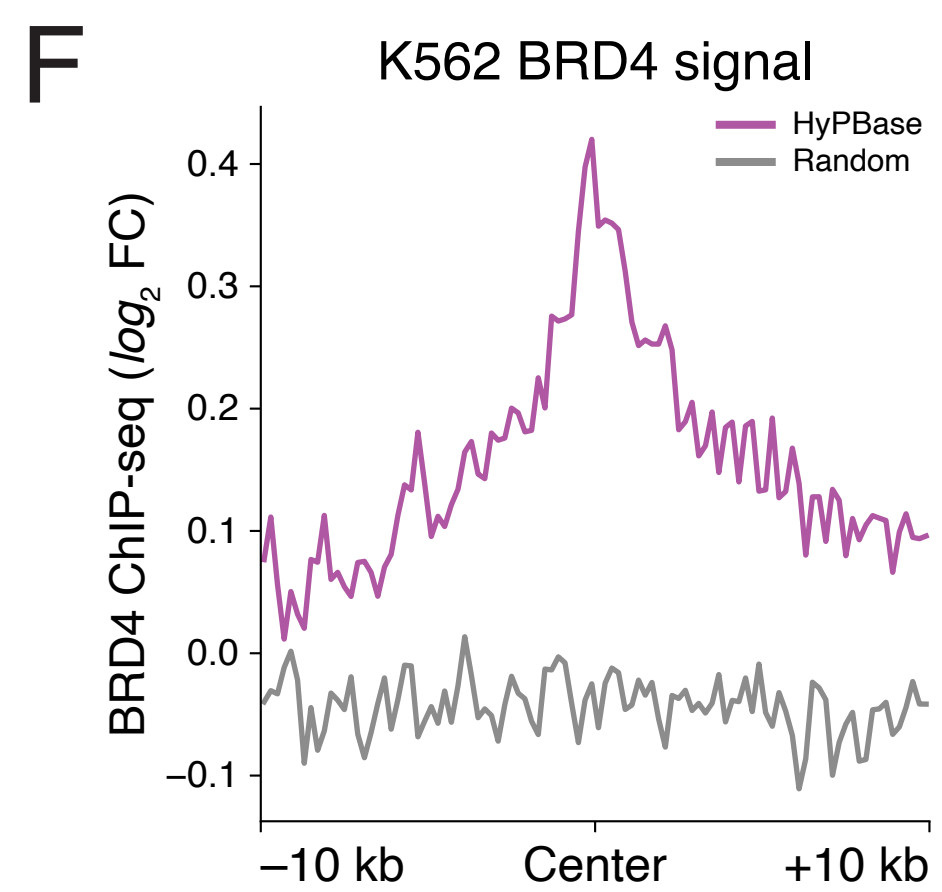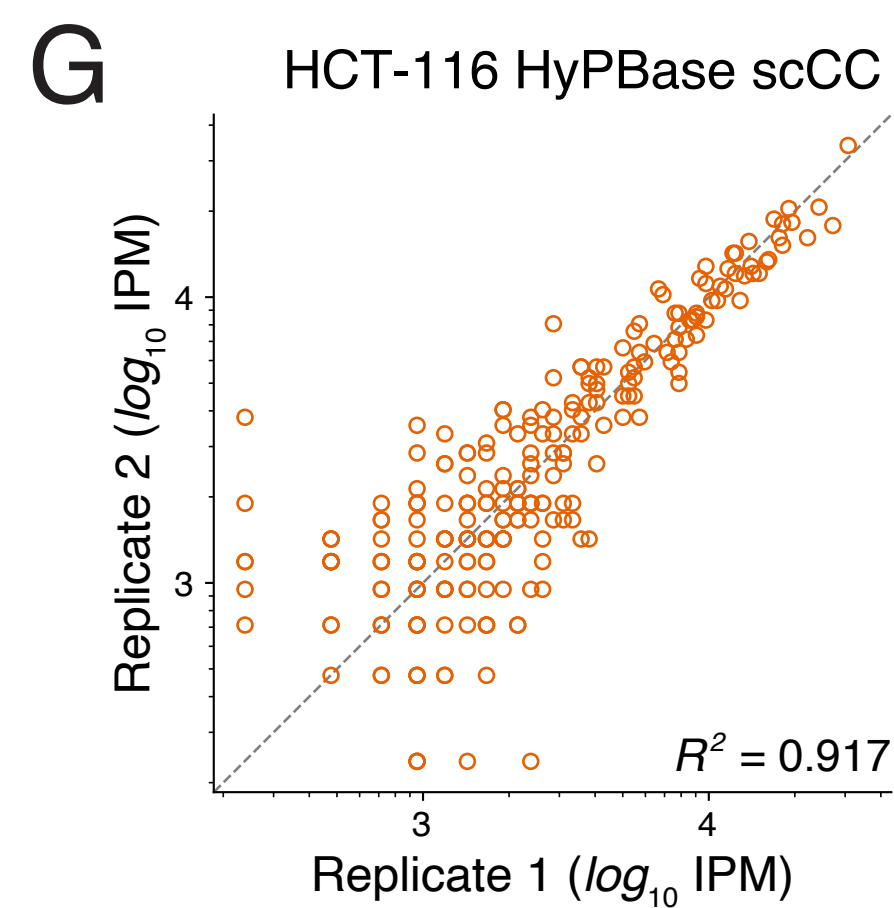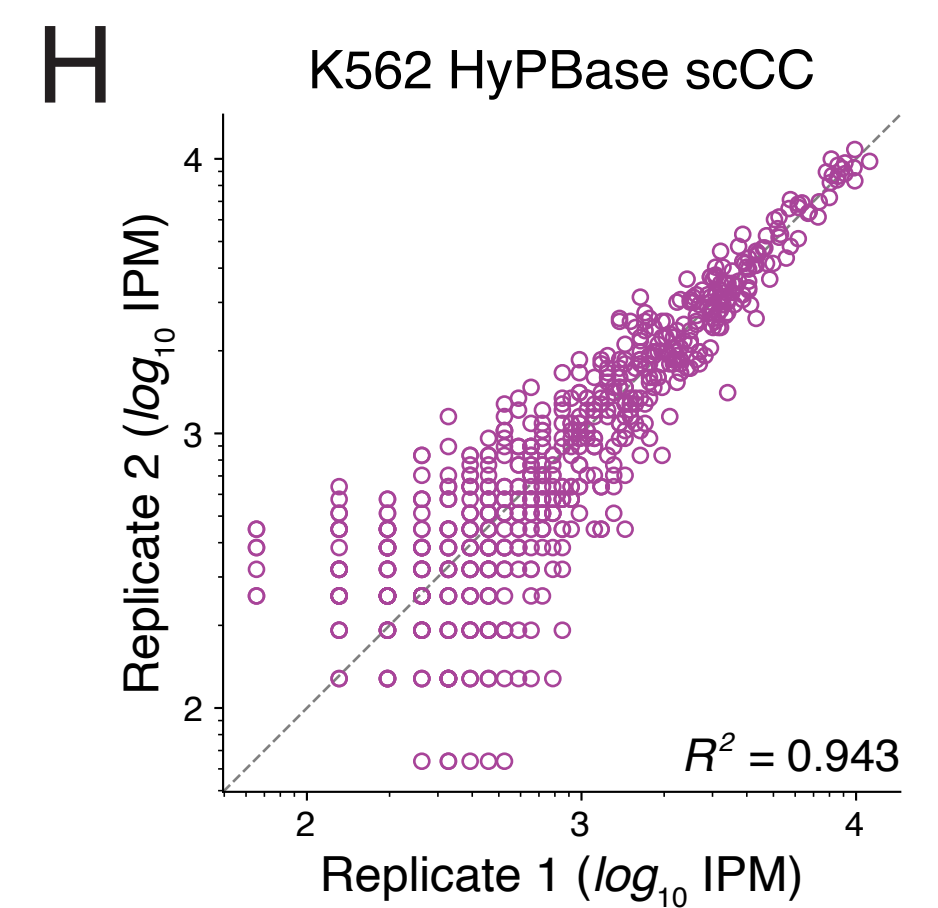

Supplement: NIHMS1608211-supplement-3.pdf [file NIHMS1608211-supplement-3.pdf]

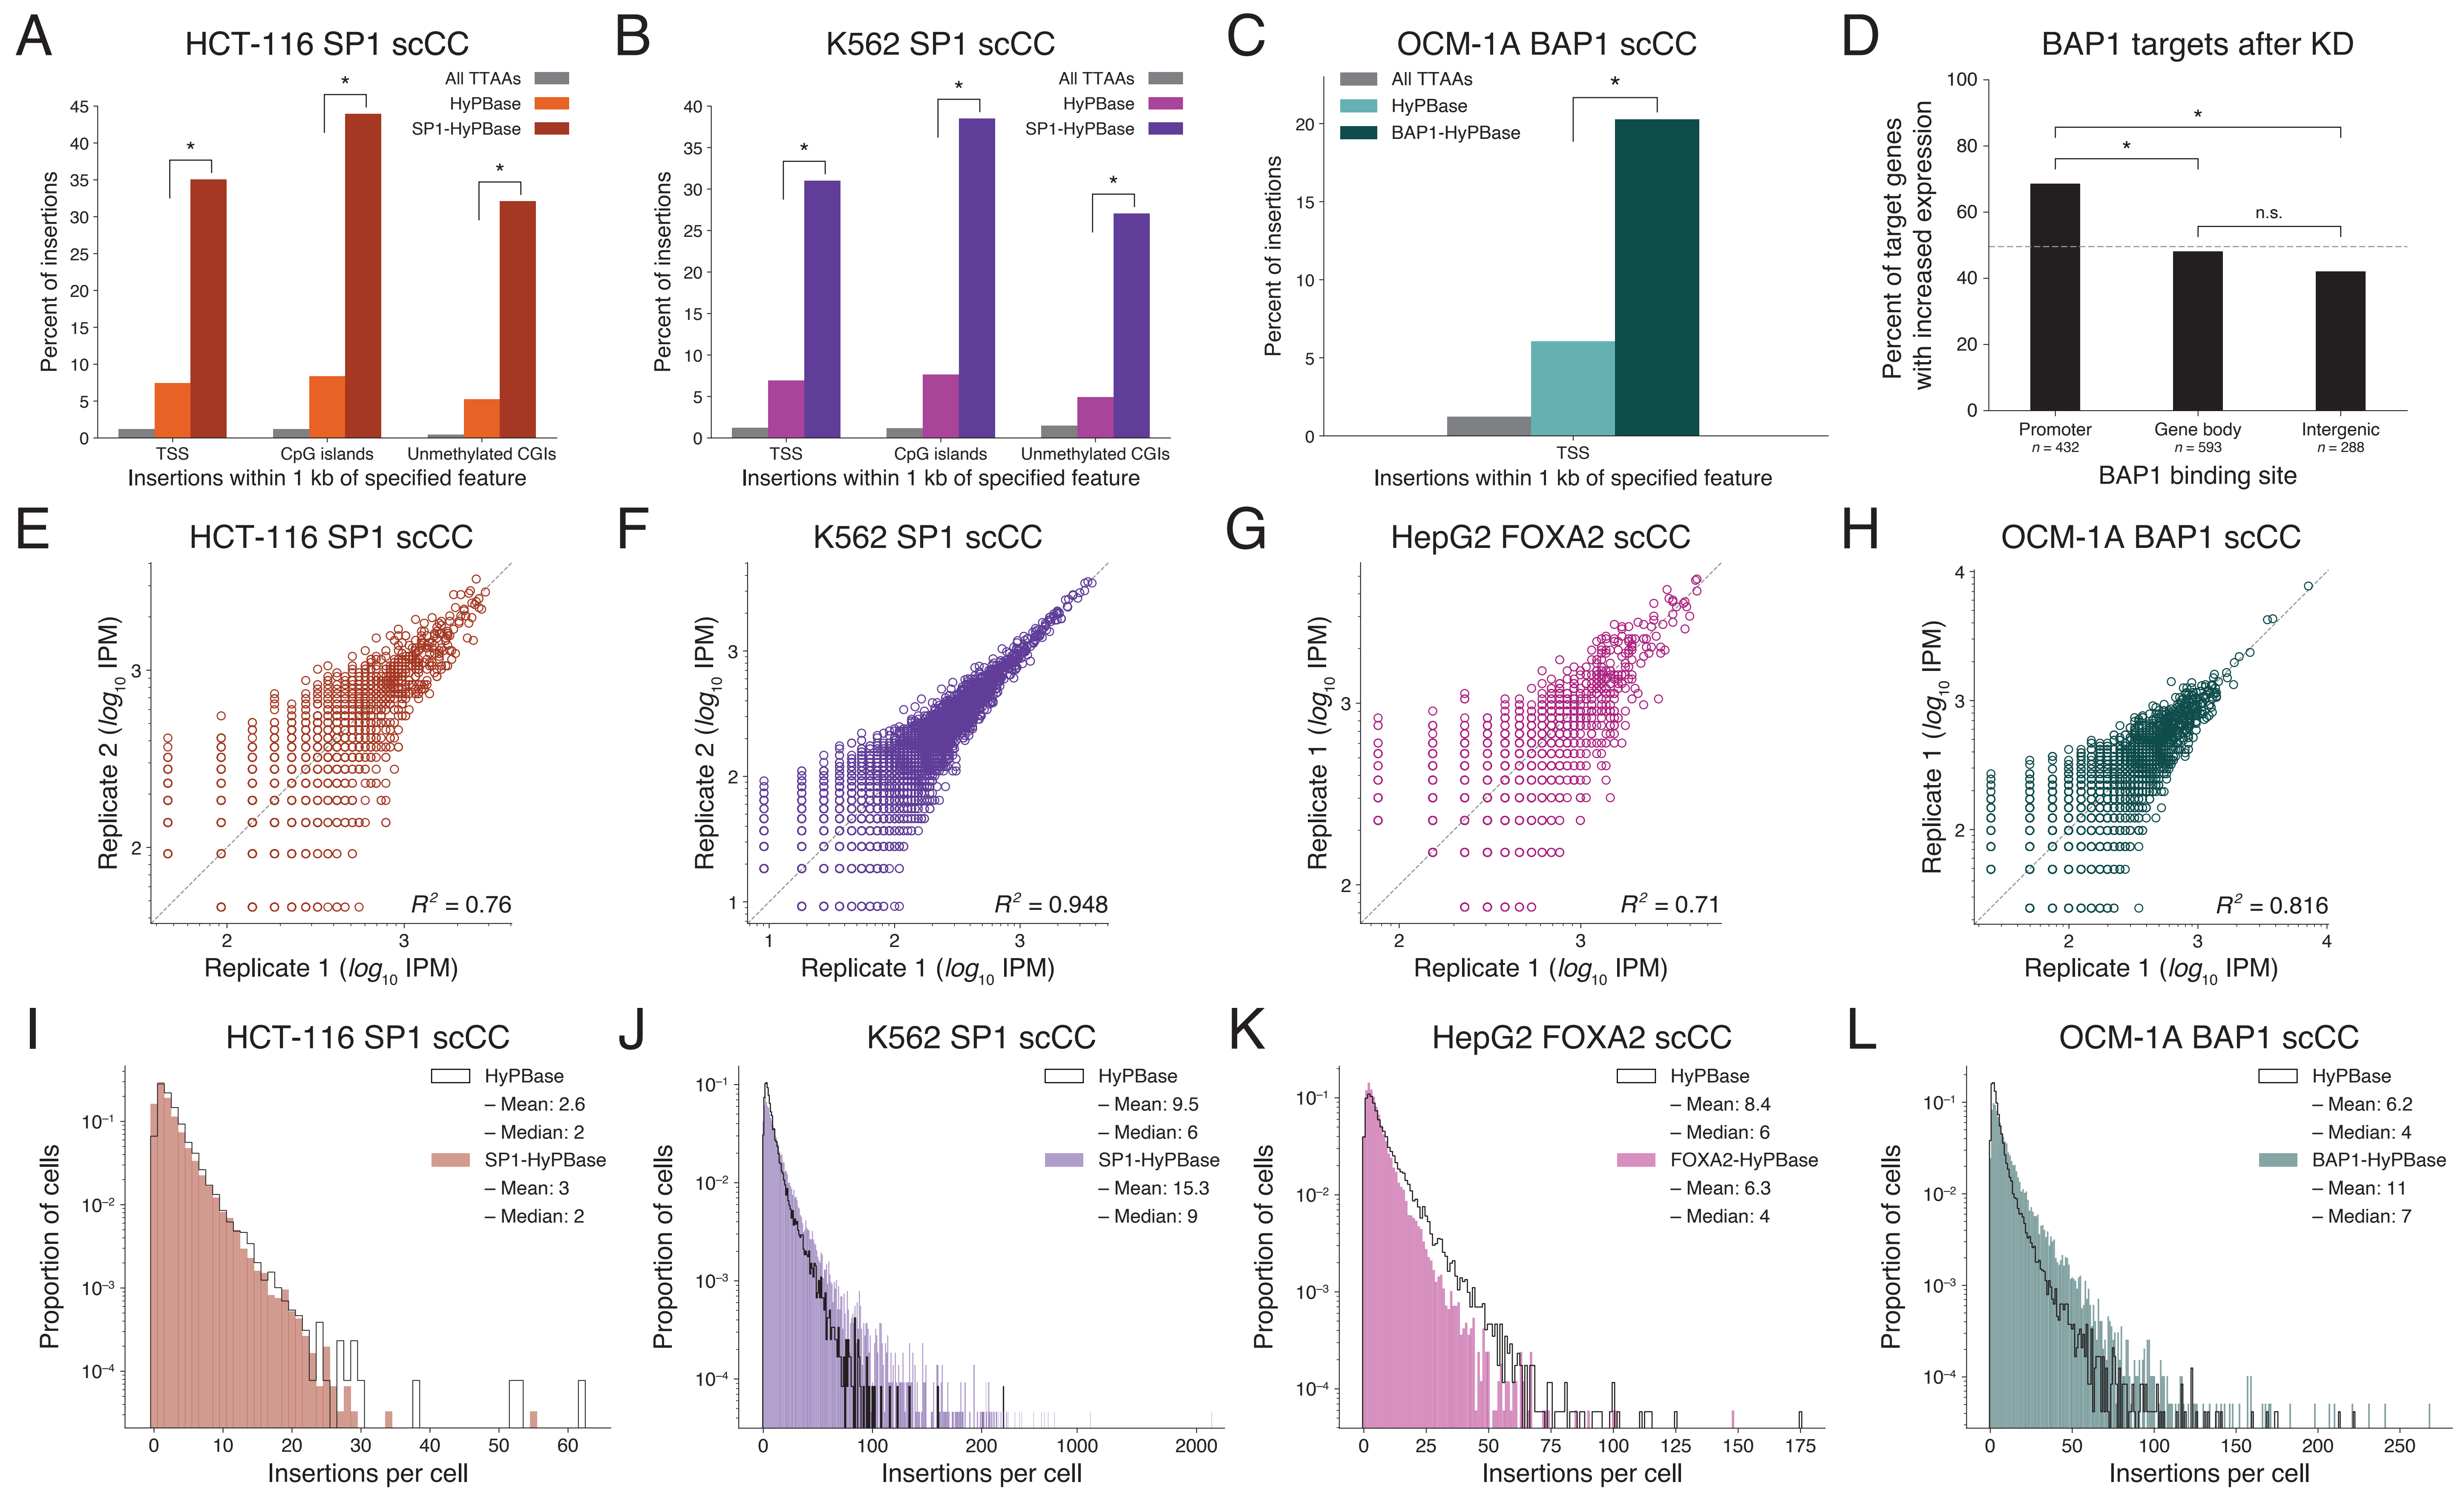

Supplement: NIHMS1608211-supplement-4.pdf [file NIHMS1608211-supplement-4.pdf]

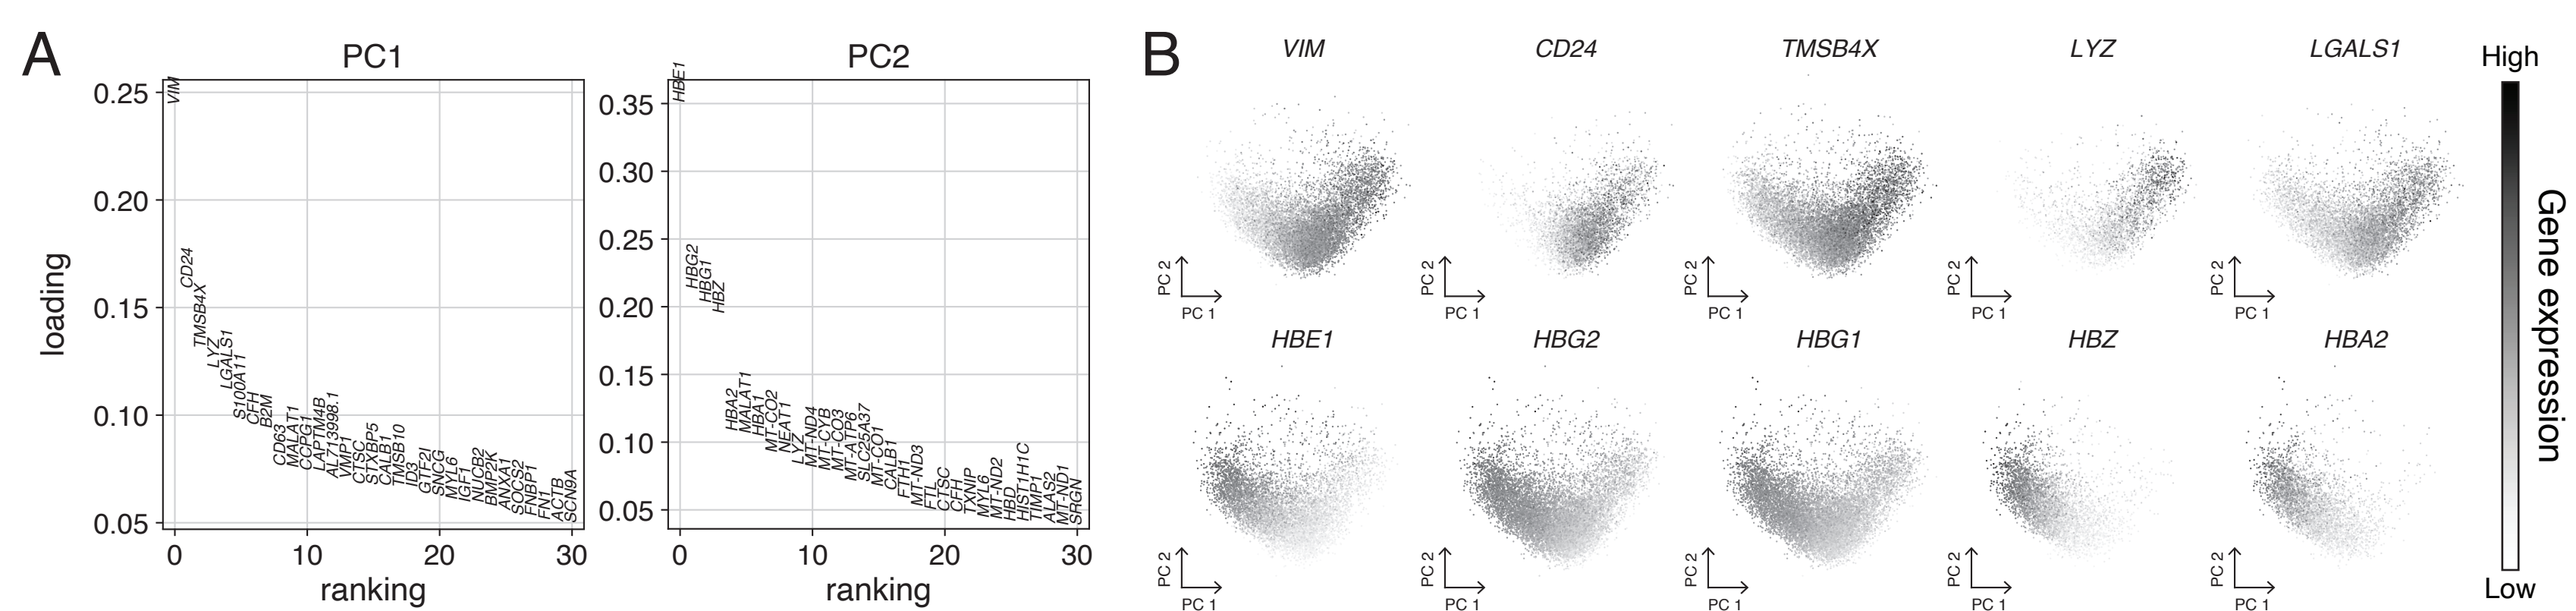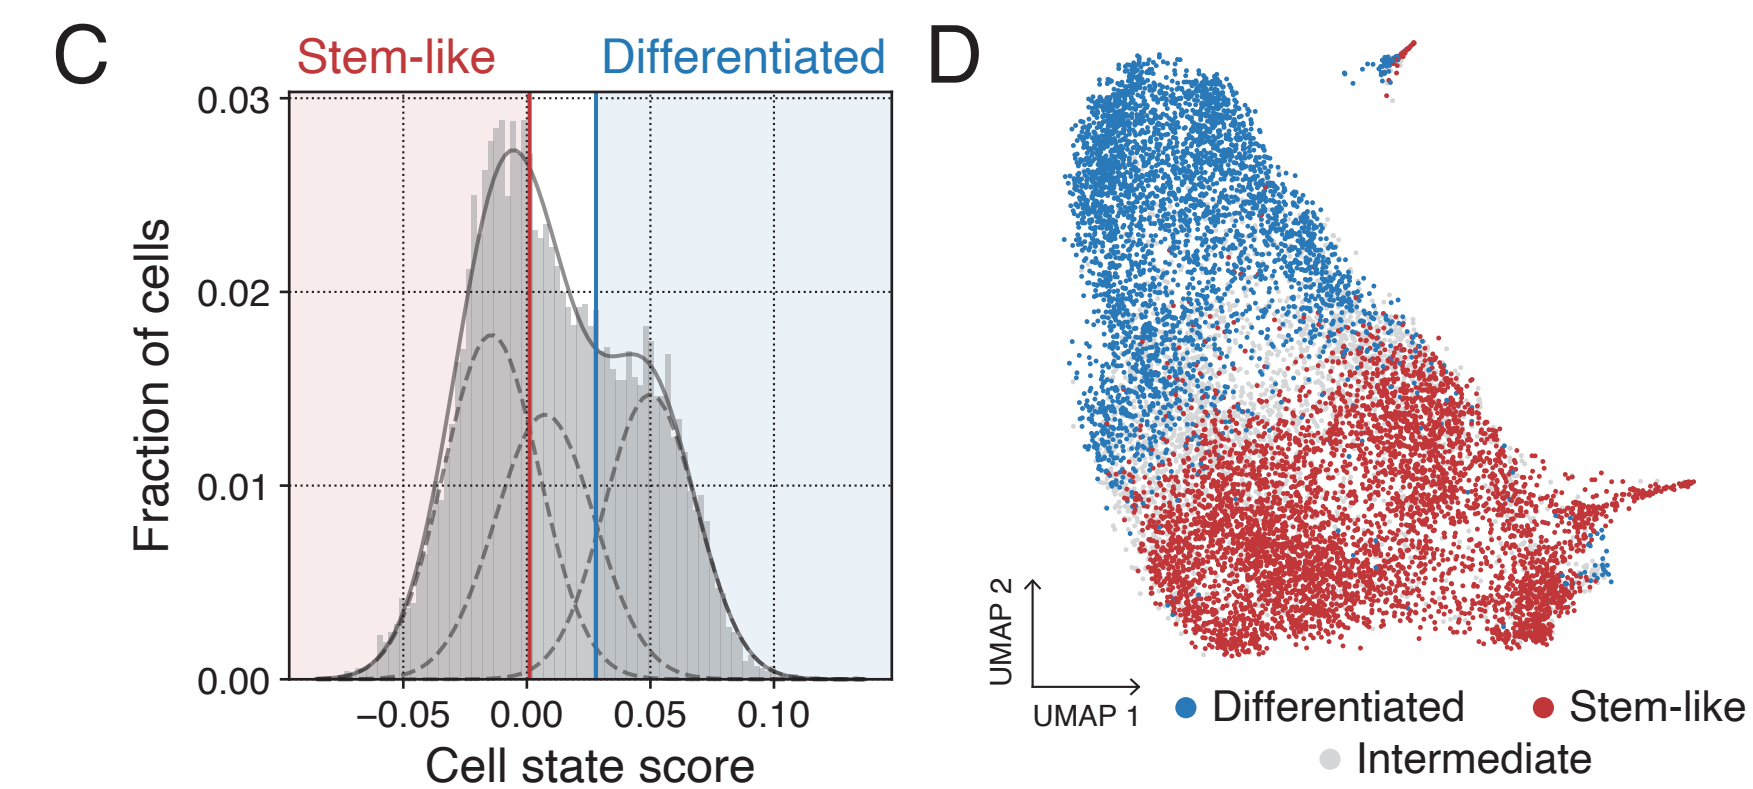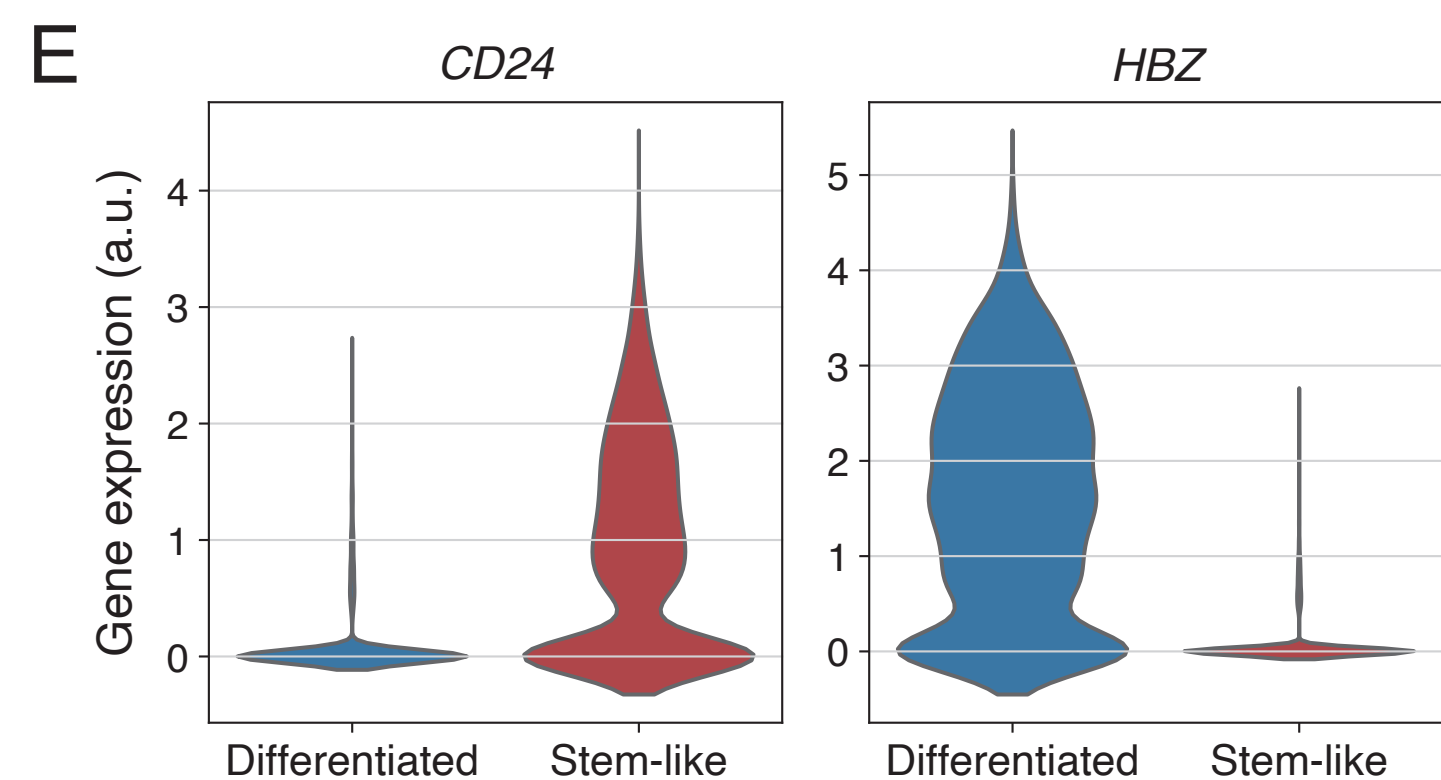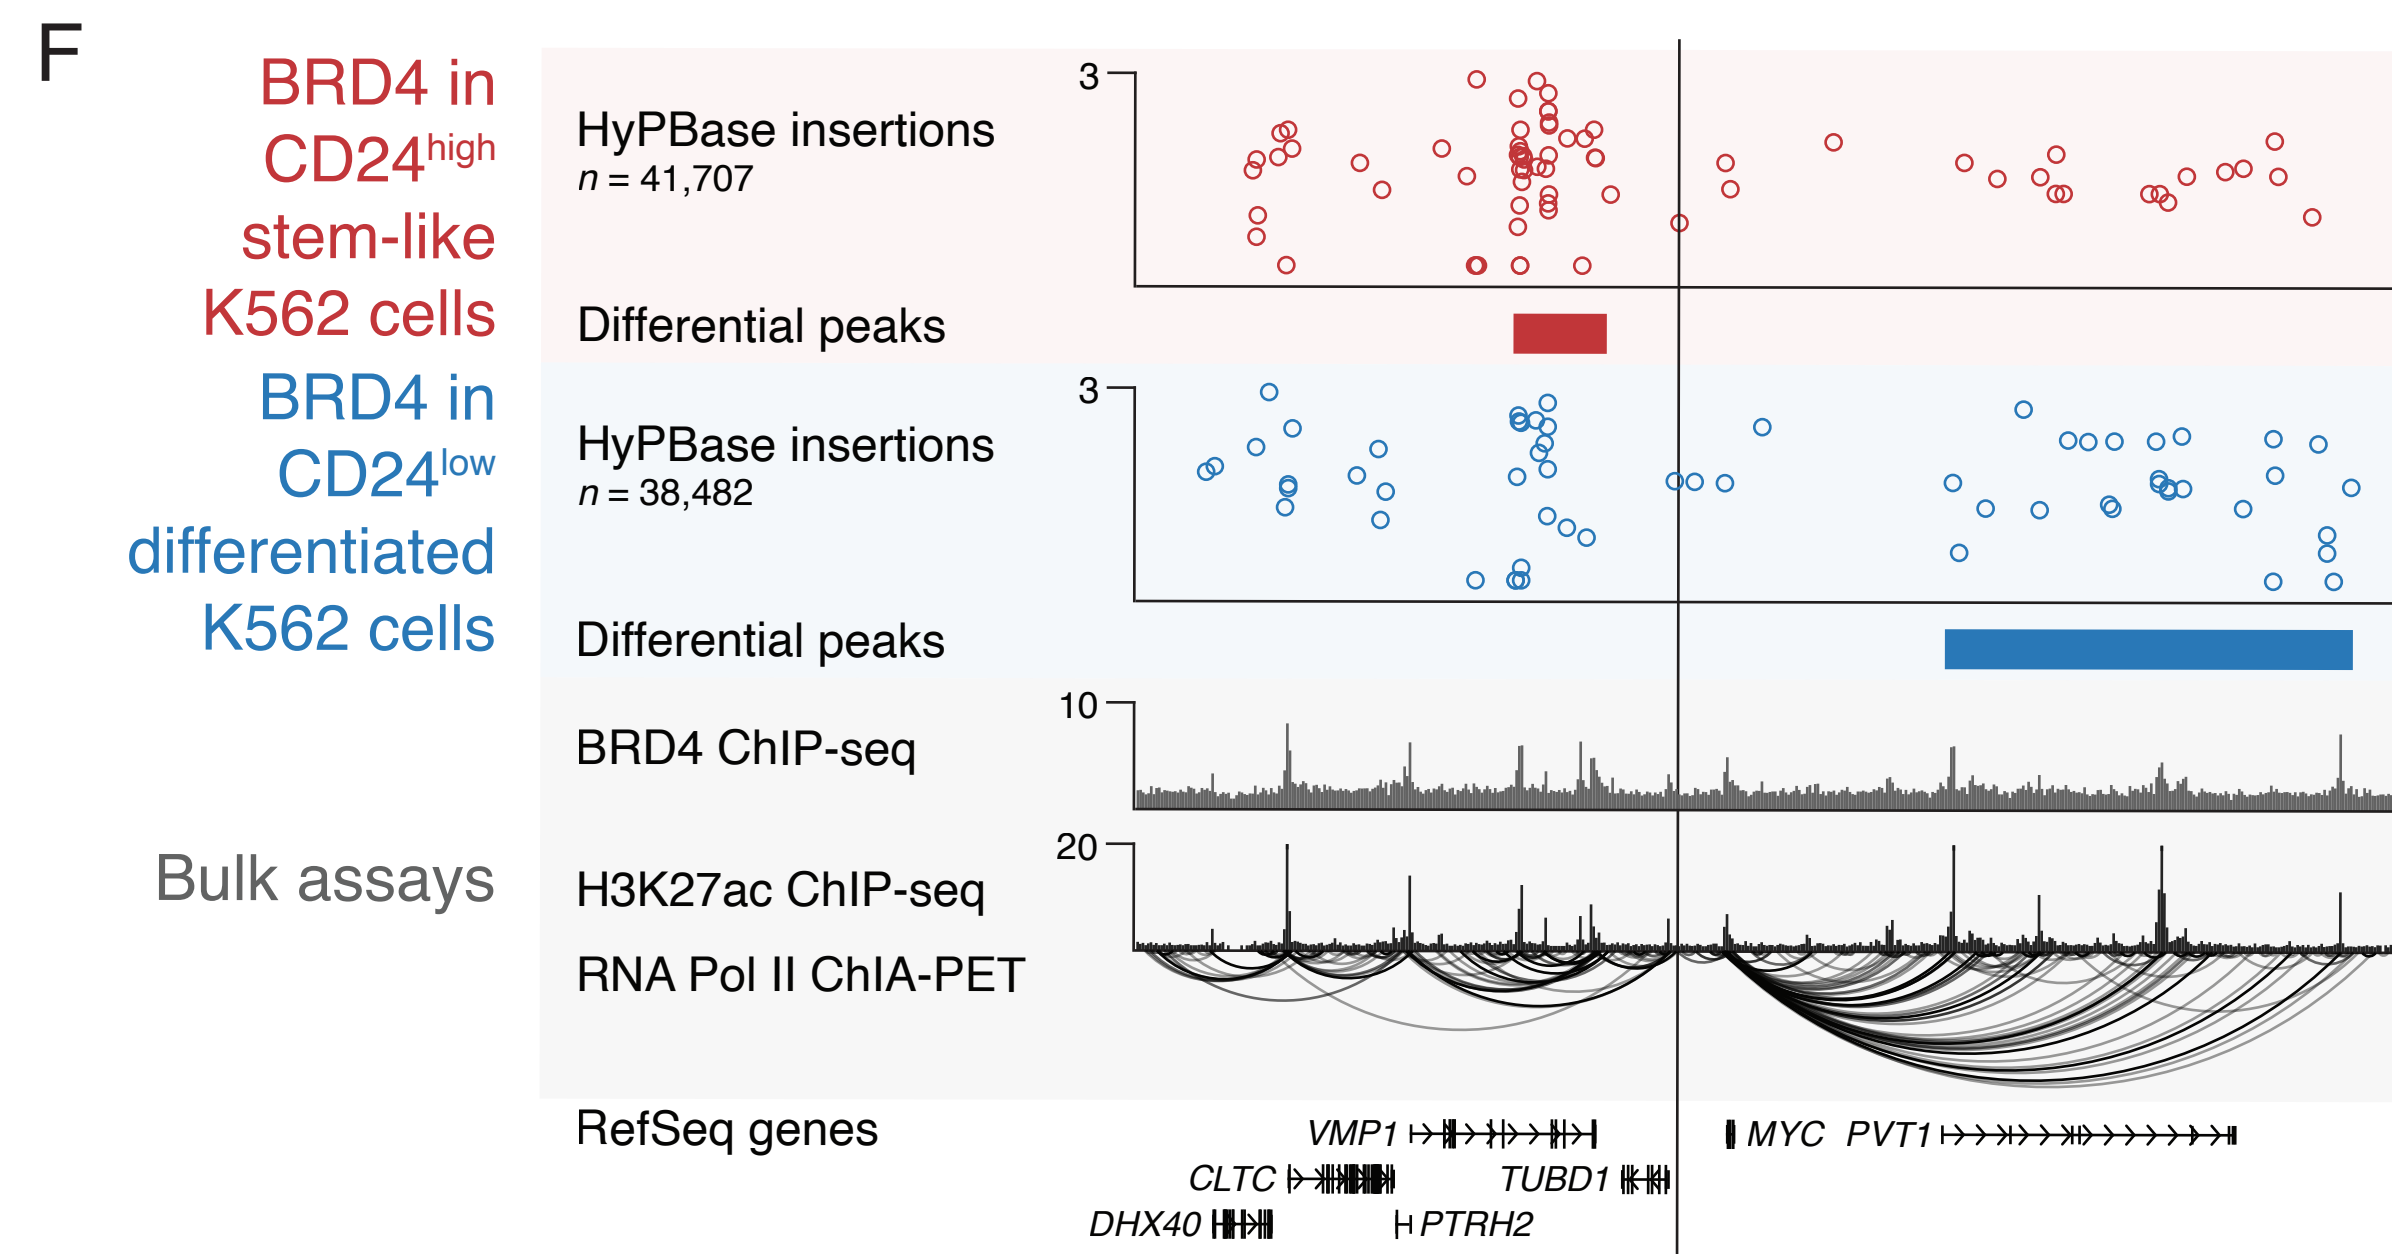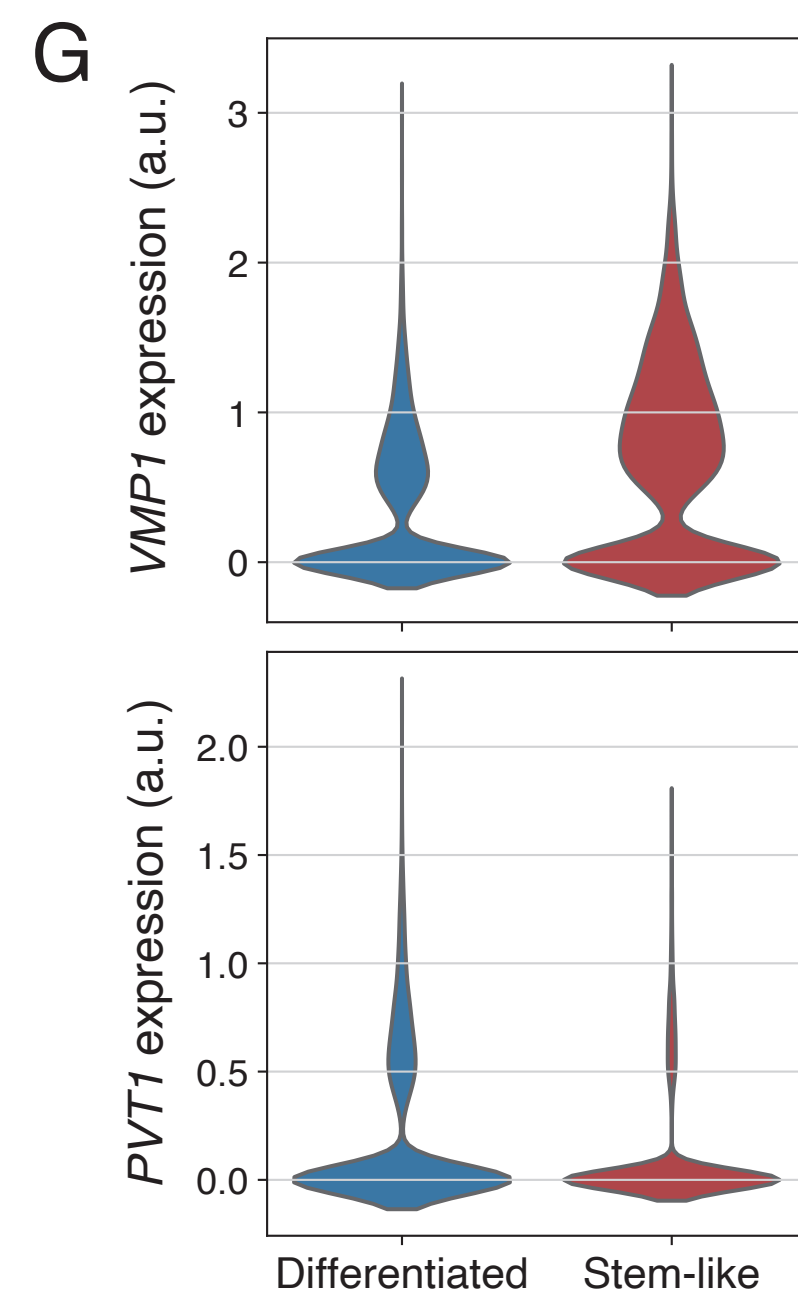

Supplement: NIHMS1608211-supplement-5.pdf [file NIHMS1608211-supplement-5.pdf]

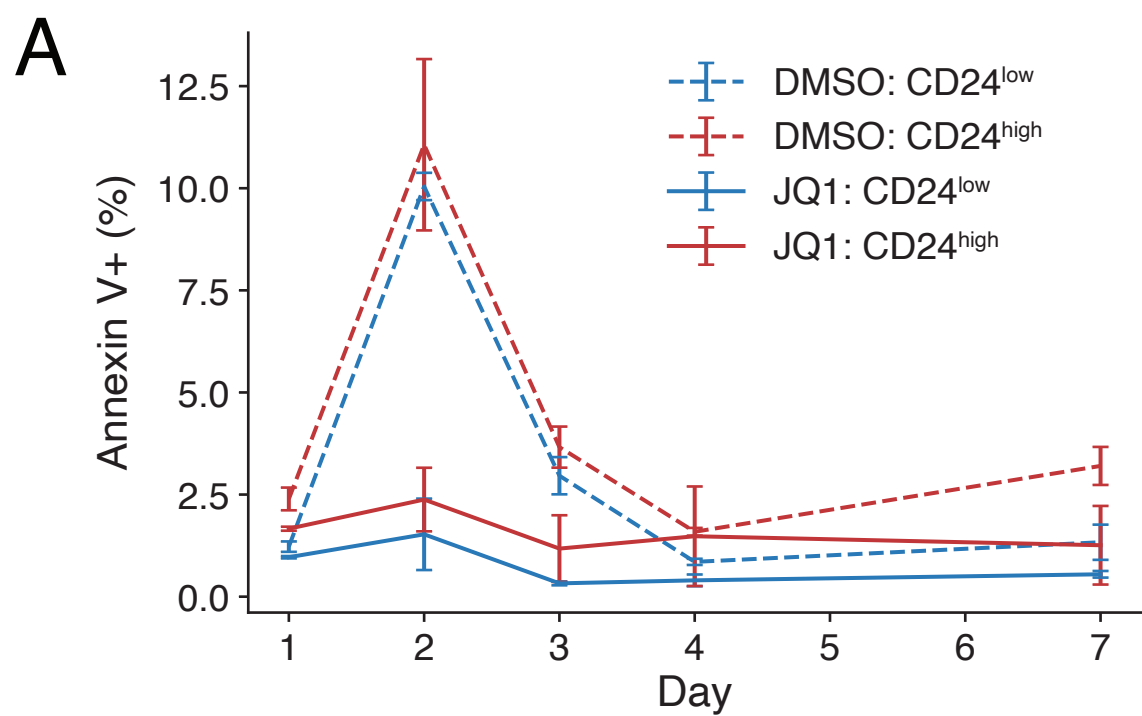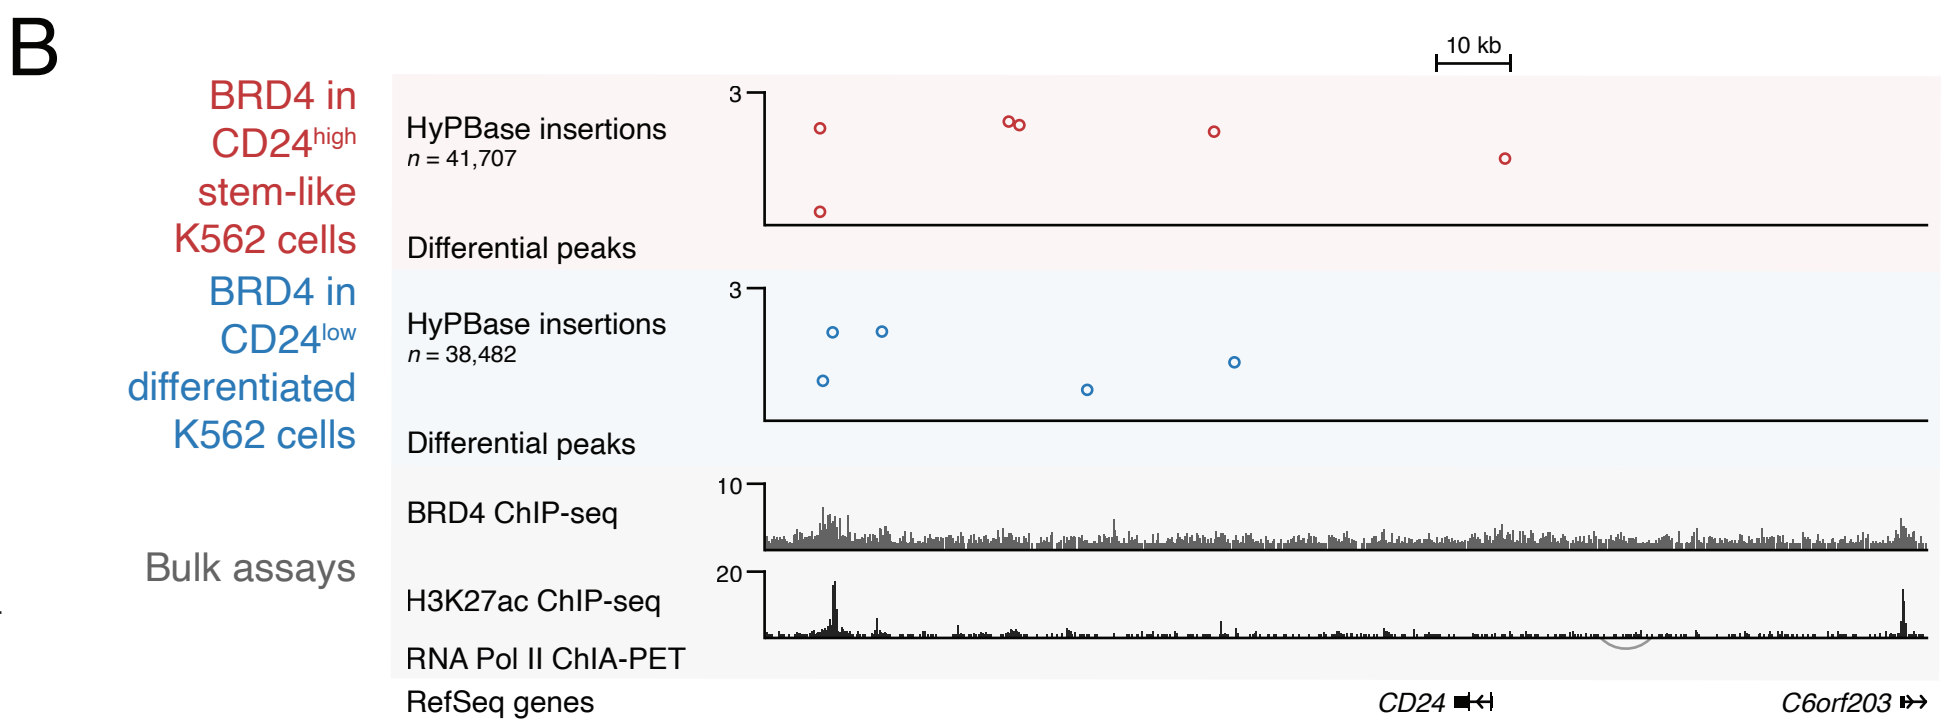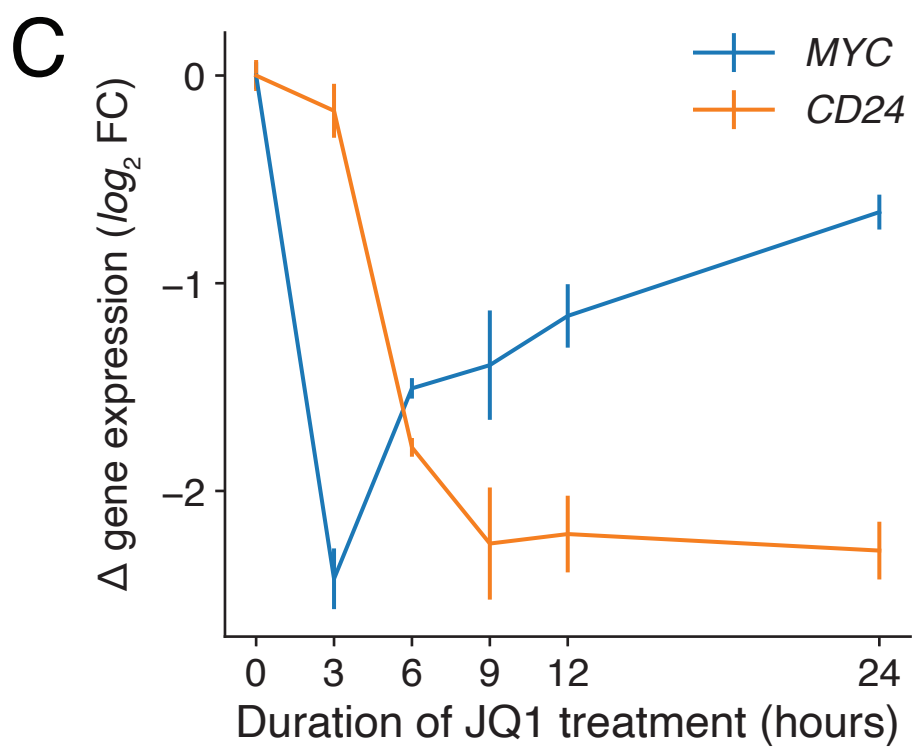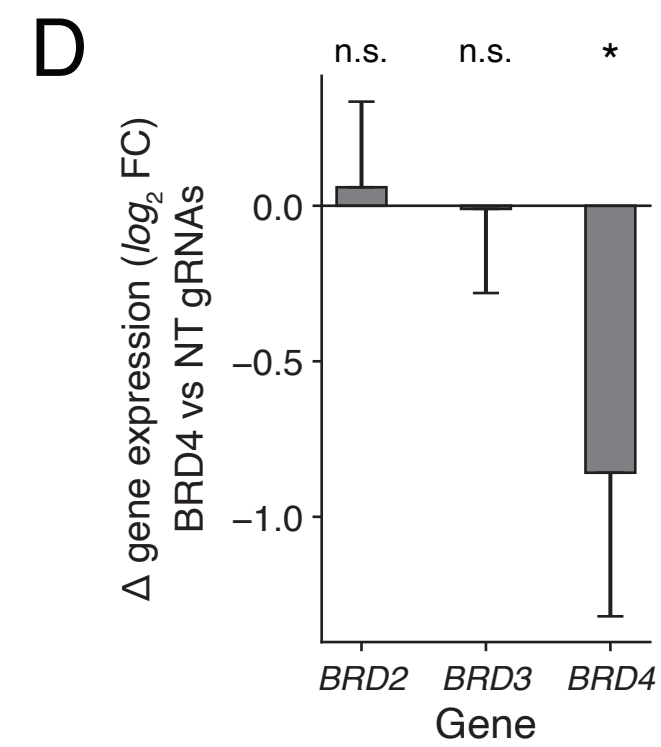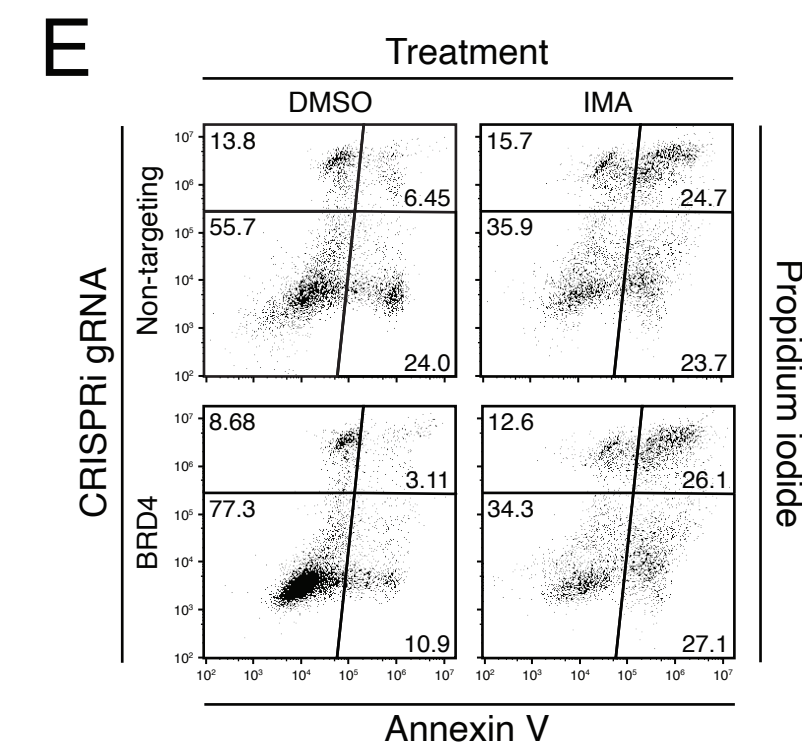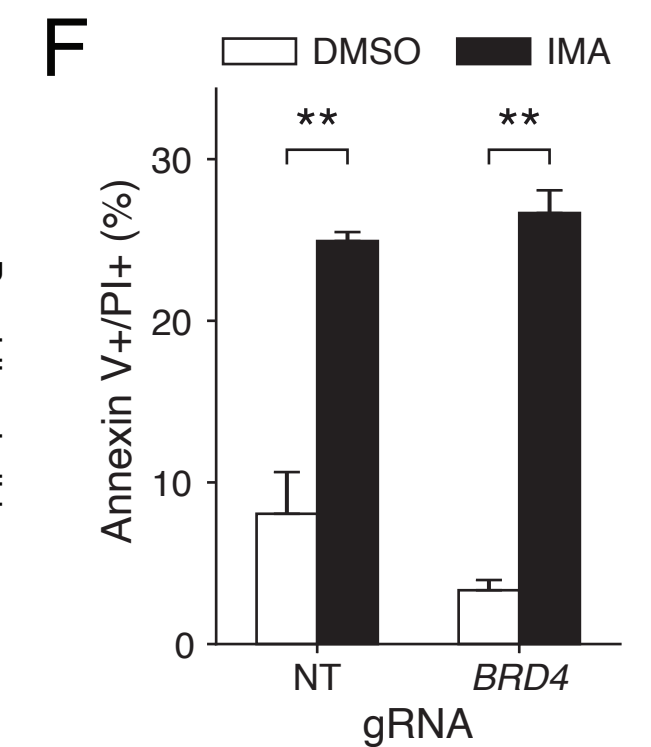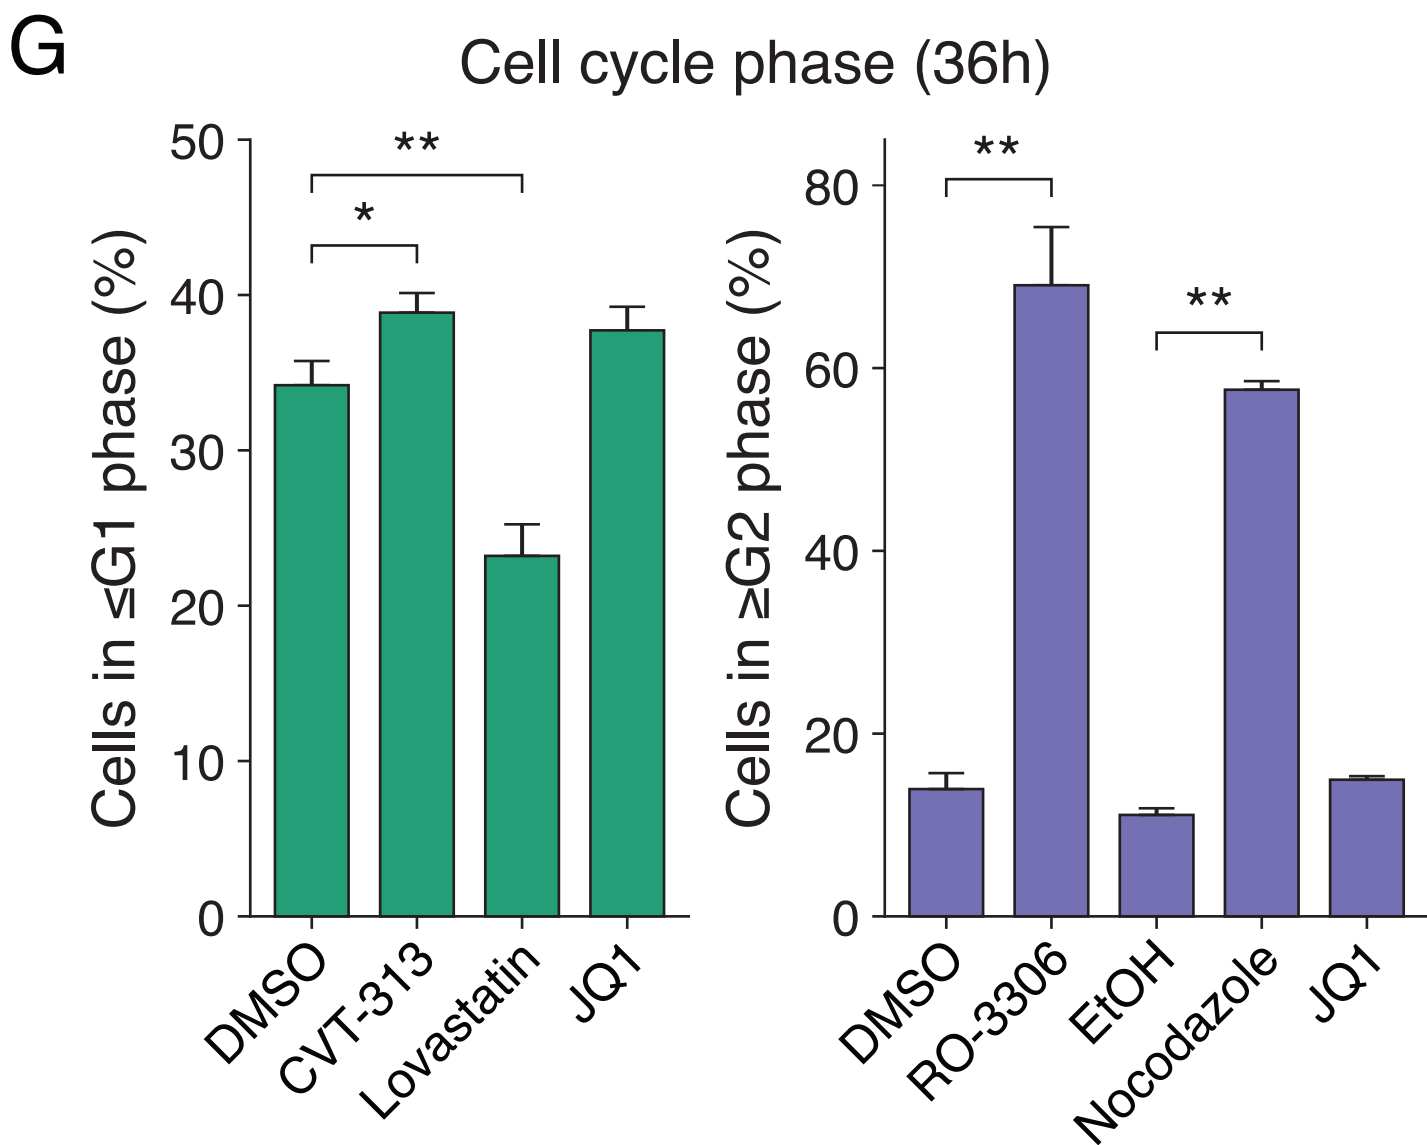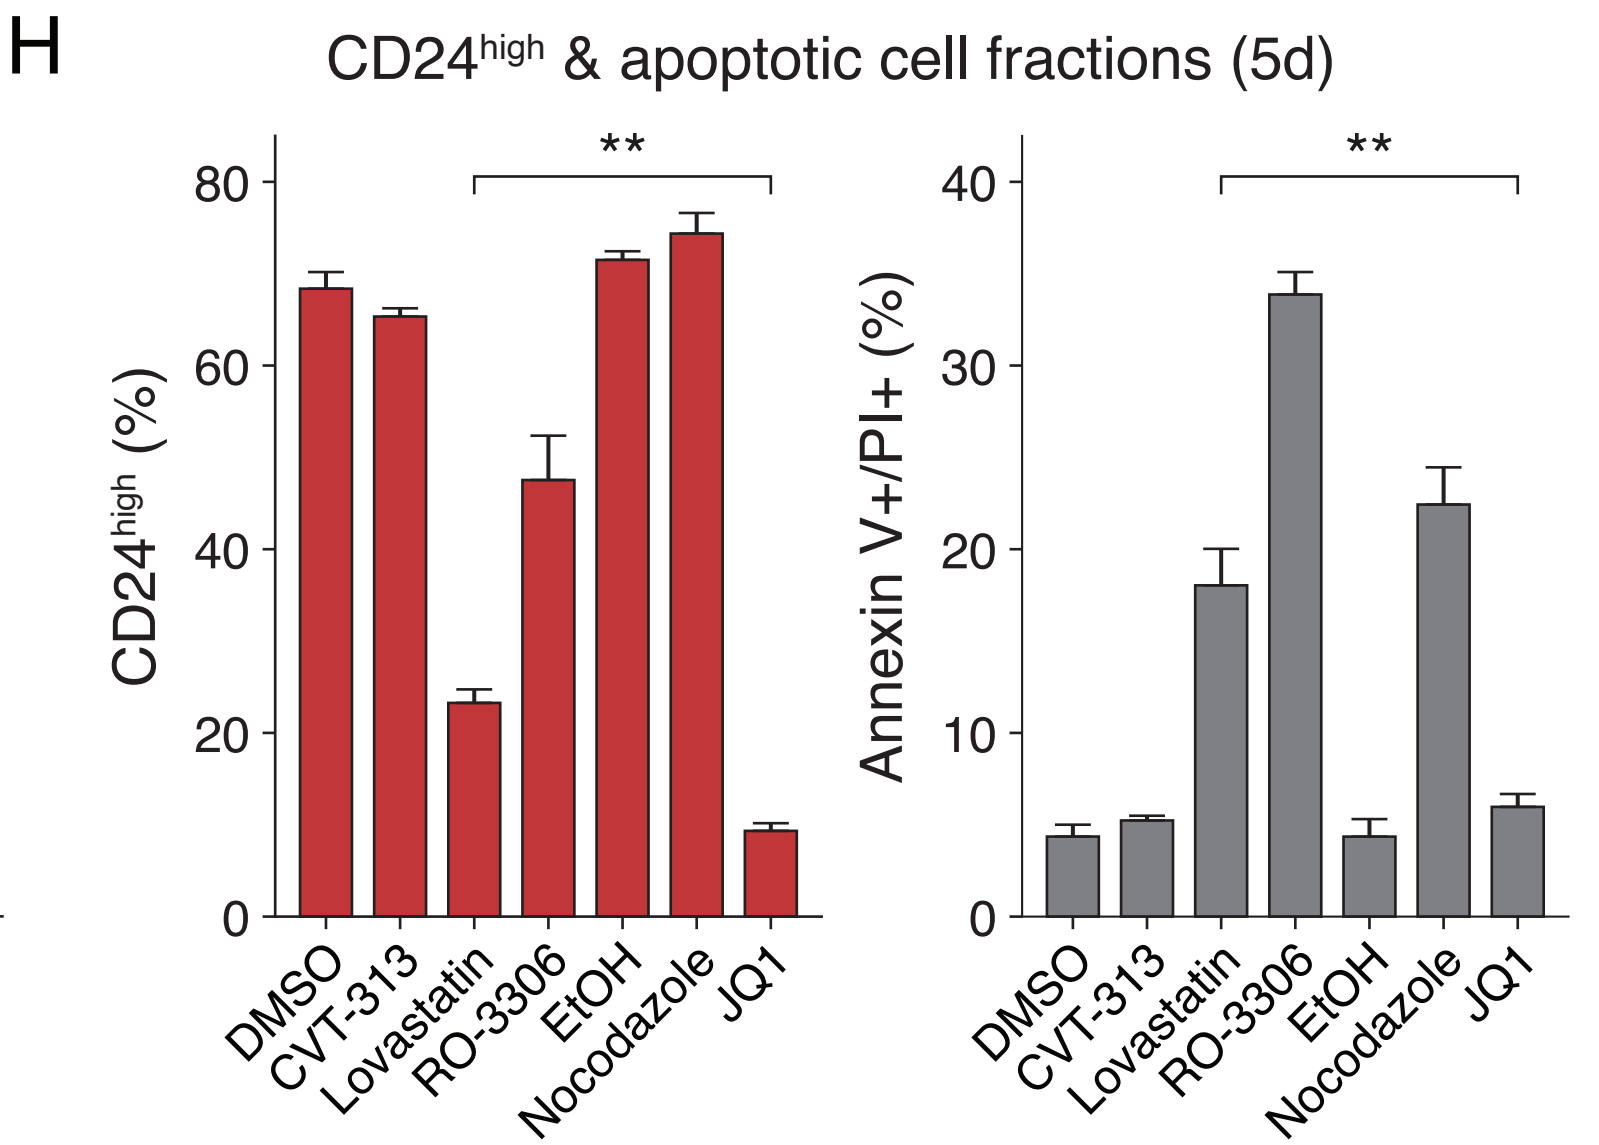

Supplement: NIHMS1608211-supplement-6.pdf [file NIHMS1608211-supplement-6.pdf]
